# Supplementary material for: Increased root hair density by loss of WRKY6 in Arabidopsis thaliana
Source: PeerJ. 2017 Jan 24;5:e2891. doi: 10.7717/peerj.2891 (PMC5267569; doi:10.7717/peerj.2891)
Supplement: Data S2 [file peerj-05-2891-s002.xlsx]

## Sheet: epicelllength
name	run	trt	rep	plant	epicelllength
Col0_2x	1	-p	1	1	207.286
Col0_2x	1	-p	1	2	212.051
Col0_2x	1	-p	1	3	180.87
Col0_2x	1	-p	1	4	229.279
Col0_2x	1	-p	1	5	159.344
Col0_2x	1	-p	2	1	169.006
Col0_2x	1	-p	2	2	163.043
Col0_2x	1	-p	2	3	213.477
Col0_2x	1	-p	2	4	244.349
Col0_2x	1	-p	2	5	160.001
Col0_2x	1	+p	1	1	168.723
Col0_2x	1	+p	1	2	183.341
Col0_2x	1	+p	1	3	261.739
Col0_2x	1	+p	1	4	199.858
Col0_2x	1	+p	1	5	178.799
Col0_2x	2	-p	1	1	261.932
Col0_2x	2	-p	1	2	264.799
Col0_2x	2	-p	1	3	274.002
Col0_2x	2	-p	1	4	185.834
Col0_2x	2	-p	2	1	224.627
Col0_2x	2	-p	2	2	242.877
Col0_2x	2	-p	2	3	236.94
Col0_2x	2	-p	2	4	312.602
Col0_2x	2	+p	1	1	281.263
Col0_2x	2	+p	1	2	226.287
Col0_2x	2	+p	1	3	232.028
Col0_2x	2	+p	1	4	270.285
Col0_2x	2	+p	2	1	203.293
Col0_2x	2	+p	2	2	249.905
Col0_2x	2	+p	2	3	289.333
Col0_2x	2	+p	2	4	254.096
Col0_4x	2	-p	1	1	258.452
Col0_4x	2	-p	1	2	252.415
Col0_4x	2	-p	1	3	177.815
Col0_4x	2	-p	1	4	262.168
Col0_4x	2	-p	2	1	267.222
Col0_4x	2	-p	2	2	338.878
Col0_4x	2	-p	2	3	208.277
Col0_4x	2	-p	2	4	237.139
Col0_4x	2	+p	1	1	326.696
Col0_4x	2	+p	1	2	401.273
Col0_4x	2	+p	1	3	332.921
Col0_4x	2	+p	1	4	393.152
Col0_4x	2	+p	2	1	308.407
Col0_4x	2	+p	2	2	244.027
Col0_4x	2	+p	2	3	275.161
Col0_4x	2	+p	2	4	366.463
Ga1	1	-p	1	1	125.727
Ga1	1	-p	1	2	172.314
Ga1	1	-p	1	3	177.392
Ga1	1	-p	1	4	182.174
Ga1	1	-p	1	5	166.542
Ga1	1	-p	2	1	160.456
Ga1	1	-p	2	2	163.064
Ga1	1	-p	2	3	156.994
Ga1	1	-p	2	4	156.363
Ga1	1	-p	2	5	237.84
Ga1	1	+p	1	1	219.567
Ga1	1	+p	1	2	167.025
Ga1	1	+p	1	3	172.574
Ga1	1	+p	1	4	202.181
Ga1	1	+p	1	5	154.72
Ga1	1	+p	2	1	264.784
Ga1	1	+p	2	2	311.542
Ga1	1	+p	2	3	238.522
Ga1	1	+p	2	4	235.227
Ga1	1	+p	2	5	318.706
Ga1	2	-p	1	1	187.83
Ga1	2	-p	1	2	167.408
Ga1	2	-p	1	3	281.966
Ga1	2	-p	1	4	187.026
Ga1	2	-p	2	1	274.805
Ga1	2	-p	2	2	190.403
Ga1	2	-p	2	3	232.306
Ga1	2	-p	2	4	347.227
Ga1	2	+p	1	1	316.46
Ga1	2	+p	1	2	347.254
Ga1	2	+p	1	3	163.482
Ga1	2	+p	1	4	278.553
Ga1	2	+p	2	1	184.643
Ga1	2	+p	2	2	146.128
Ga1	2	+p	2	3	192.551
Ga1	2	+p	2	4	285.812
Kondara	1	-p	1	1	170.878
Kondara	1	-p	1	2	187.391
Kondara	1	-p	1	3	297.846
Kondara	1	-p	1	4	213.565
Kondara	1	-p	1	5	202.08
Kondara	1	-p	2	1	249.57
Kondara	1	-p	2	2	178.48
Kondara	1	-p	2	3	214.857
Kondara	1	-p	2	4	193.931
Kondara	1	-p	2	5	271.427
Kondara	1	+p	1	1	181.872
Kondara	1	+p	1	2	190.87
Kondara	1	+p	1	3	193.49
Kondara	1	+p	1	4	203.077
Kondara	1	+p	1	5	228.716
Kondara	1	+p	2	1	209.232
Kondara	1	+p	2	2	188.261
Kondara	1	+p	2	3	192.542
Kondara	1	+p	2	4	255.865
Kondara	1	+p	2	5	224.382
Kondara	2	-p	1	1	251.014
Kondara	2	-p	1	2	216.114
Kondara	2	-p	1	3	259.002
Kondara	2	-p	1	4	266.077
Kondara	2	-p	2	1	286.936
Kondara	2	-p	2	2	343.799
Kondara	2	-p	2	3	243.522
Kondara	2	-p	2	4	303.206
Kondara	2	+p	1	1	255.361
Kondara	2	+p	1	2	195.716
Kondara	2	+p	1	3	305.726
Kondara	2	+p	1	4	197.514
Kondara	2	+p	2	1	282.252
Kondara	2	+p	2	2	237.517
Kondara	2	+p	2	3	340.778
Kondara	2	+p	2	4	230.549
WRKY6	2	-p	1	1	218.379
WRKY6	2	-p	1	2	190.495
WRKY6	2	-p	1	3	257.748
WRKY6	2	-p	1	4	212.963
WRKY6	2	-p	2	1	167.122
WRKY6	2	-p	2	2	211.145
WRKY6	2	-p	2	3	248.282
WRKY6	2	-p	2	4	261.695
WRKY6	2	+p	1	1	272.653
WRKY6	2	+p	1	2	256.847
WRKY6	2	+p	1	3	314.519
WRKY6	2	+p	1	4	201.05
WRKY6	2	+p	2	1	204.1
WRKY6	2	+p	2	2	271.8
WRKY6	2	+p	2	3	173.782
WRKY6	2	+p	2	4	238.503

## Sheet: rootdia
					rootdia
Col0_2x	1	-p	1	1	155.652
Col0_2x	1	-p	1	2	149.179
Col0_2x	1	-p	1	3	156.008
Col0_2x	1	-p	1	4	165.654
Col0_2x	1	-p	1	5	145.514
Col0_2x	1	-p	2	1	121.157
Col0_2x	1	-p	2	2	121.767
Col0_2x	1	-p	2	3	127.831
Col0_2x	1	-p	2	4	112.464
Col0_2x	1	-p	2	5	149.336
Col0_2x	1	+p	1	1	134.469
Col0_2x	1	+p	1	2	139.42
Col0_2x	1	+p	1	3	148.71
Col0_2x	1	+p	1	4	122.508
Col0_2x	1	+p	1	5	117.634
Col0_2x	2	-p	1	1	138.965
Col0_2x	2	-p	1	2	174.7
Col0_2x	2	-p	1	3	194.251
Col0_2x	2	-p	1	4	182.936
Col0_2x	2	-p	2	1	168.578
Col0_2x	2	-p	2	2	157.783
Col0_2x	2	-p	2	3	167.688
Col0_2x	2	-p	2	4	159.41
Col0_2x	2	+p	1	1	172.475
Col0_2x	2	+p	1	2	177.348
Col0_2x	2	+p	1	3	139.379
Col0_2x	2	+p	1	4	166.03
Col0_2x	2	+p	2	1	124.275
Col0_2x	2	+p	2	2	184.503
Col0_2x	2	+p	2	3	177.715
Col0_2x	2	+p	2	4	161.127
Col0_4x	2	-p	1	1	180.003
Col0_4x	2	-p	1	2	173.961
Col0_4x	2	-p	1	3	190.838
Col0_4x	2	-p	1	4	200.484
Col0_4x	2	-p	2	1	211.402
Col0_4x	2	-p	2	2	192.558
Col0_4x	2	-p	2	3	202.098
Col0_4x	2	-p	2	4	206.169
Col0_4x	2	+p	1	1	176.448
Col0_4x	2	+p	1	2	198.029
Col0_4x	2	+p	1	3	182.986
Col0_4x	2	+p	1	4	184.322
Col0_4x	2	+p	2	1	146.996
Col0_4x	2	+p	2	2	173.058
Col0_4x	2	+p	2	3	160.876
Col0_4x	2	+p	2	4	181.788
Ga1	1	-p	1	1	173.169
Ga1	1	-p	1	2	161.099
Ga1	1	-p	1	3	156.817
Ga1	1	-p	1	4	170.641
Ga1	1	-p	1	5	155.645
Ga1	1	-p	2	1	141.091
Ga1	1	-p	2	2	176.561
Ga1	1	-p	2	3	151.137
Ga1	1	-p	2	4	176.202
Ga1	1	-p	2	5	188.172
Ga1	1	+p	1	1	160.002
Ga1	1	+p	1	2	151.58
Ga1	1	+p	1	3	131.842
Ga1	1	+p	1	4	176.507
Ga1	1	+p	1	5	164.218
Ga1	1	+p	2	1	197.397
Ga1	1	+p	2	2	166.321
Ga1	1	+p	2	3	179.8
Ga1	1	+p	2	4	179.983
Ga1	1	+p	2	5	171.56
Ga1	2	-p	1	1	194.785
Ga1	2	-p	1	2	175.745
Ga1	2	-p	1	3	227.96
Ga1	2	-p	1	4	141.315
Ga1	2	-p	2	1	204.928
Ga1	2	-p	2	2	198.776
Ga1	2	-p	2	3	208.987
Ga1	2	-p	2	4	206.902
Ga1	2	+p	1	1	151.601
Ga1	2	+p	1	2	194.038
Ga1	2	+p	1	3	181.356
Ga1	2	+p	1	4	171.606
Ga1	2	+p	2	1	187.568
Ga1	2	+p	2	2	143.506
Ga1	2	+p	2	3	184.062
Ga1	2	+p	2	4	158.306
Kondara	1	-p	1	1	136.348
Kondara	1	-p	1	2	129.93
Kondara	1	-p	1	3	127.329
Kondara	1	-p	1	4	140.518
Kondara	1	-p	1	5	126.499
Kondara	1	-p	2	1	152.5
Kondara	1	-p	2	2	184.369
Kondara	1	-p	2	3	145.963
Kondara	1	-p	2	4	145.481
Kondara	1	-p	2	5	142.695
Kondara	1	+p	1	1	144.318
Kondara	1	+p	1	2	140.776
Kondara	1	+p	1	3	140.392
Kondara	1	+p	1	4	137.218
Kondara	1	+p	1	5	145.041
Kondara	1	+p	2	1	154.827
Kondara	1	+p	2	2	159.621
Kondara	1	+p	2	3	141.942
Kondara	1	+p	2	4	152.67
Kondara	1	+p	2	5	167.828
Kondara	2	-p	1	1	156.292
Kondara	2	-p	1	2	154.191
Kondara	2	-p	1	3	126.022
Kondara	2	-p	1	4	141.788
Kondara	2	-p	2	1	158.716
Kondara	2	-p	2	2	162.064
Kondara	2	-p	2	3	152.013
Kondara	2	-p	2	4	167.594
Kondara	2	+p	1	1	146.346
Kondara	2	+p	1	2	153.098
Kondara	2	+p	1	3	177.513
Kondara	2	+p	1	4	147.918
Kondara	2	+p	2	1	168.807
Kondara	2	+p	2	2	162.618
Kondara	2	+p	2	3	143.297
Kondara	2	+p	2	4	144.825
WRKY6	2	-p	1	1	148.139
WRKY6	2	-p	1	2	152.732
WRKY6	2	-p	1	3	182.057
WRKY6	2	-p	1	4	200.97
WRKY6	2	-p	2	1	170.787
WRKY6	2	-p	2	2	144.624
WRKY6	2	-p	2	3	152.73
WRKY6	2	-p	2	4	156.891
WRKY6	2	+p	1	1	159.127
WRKY6	2	+p	1	2	176.831
WRKY6	2	+p	1	3	159.452
WRKY6	2	+p	1	4	186.125
WRKY6	2	+p	2	1	135.339
WRKY6	2	+p	2	2	134.759
WRKY6	2	+p	2	3	155.365
WRKY6	2	+p	2	4	155.057

## Sheet: cortexdia
name	run	trt	rep	plant	cell	cortexdia
Col0_2x	1	-p	1	1	1	35.291
Col0_2x	1	-p	1	1	2	32.857
Col0_2x	1	-p	1	1	3	32.231
Col0_2x	1	-p	1	2	1	36.032
Col0_2x	1	-p	1	2	2	30.955
Col0_2x	1	-p	1	2	3	24.064
Col0_2x	1	-p	1	3	1	33.599
Col0_2x	1	-p	1	3	2	27.949
Col0_2x	1	-p	1	3	3	26.753
Col0_2x	1	-p	1	4	1	30.919
Col0_2x	1	-p	1	4	2	25.322
Col0_2x	1	-p	1	4	3	21.743
Col0_2x	1	-p	1	5	1	30.812
Col0_2x	1	-p	1	5	2	31.931
Col0_2x	1	-p	1	5	3	27.279
Col0_2x	1	-p	2	1	1	23.191
Col0_2x	1	-p	2	1	2	26.747
Col0_2x	1	-p	2	1	3	24.6
Col0_2x	1	-p	2	2	1	21.145
Col0_2x	1	-p	2	2	2	25.001
Col0_2x	1	-p	2	2	3	24.383
Col0_2x	1	-p	2	3	1	21.638
Col0_2x	1	-p	2	3	2	27.322
Col0_2x	1	-p	2	3	3	23.234
Col0_2x	1	-p	2	4	1	22.694
Col0_2x	1	-p	2	4	2	23.67
Col0_2x	1	-p	2	4	3	25.356
Col0_2x	1	-p	2	5	1	27.88
Col0_2x	1	-p	2	5	2	25.445
Col0_2x	1	-p	2	5	3	18.631
Col0_2x	1	+p	1	1	1	29.327
Col0_2x	1	+p	1	1	2	22.7
Col0_2x	1	+p	1	1	3	26.127
Col0_2x	1	+p	1	2	1	31.536
Col0_2x	1	+p	1	2	2	35.434
Col0_2x	1	+p	1	2	3	25.685
Col0_2x	1	+p	1	3	1	24.465
Col0_2x	1	+p	1	3	2	30.824
Col0_2x	1	+p	1	3	3	28.255
Col0_2x	1	+p	1	4	1	23.649
Col0_2x	1	+p	1	4	2	22.412
Col0_2x	1	+p	1	4	3	23.727
Col0_2x	1	+p	1	5	1	21.202
Col0_2x	1	+p	1	5	2	25.902
Col0_2x	1	+p	1	5	3	24.901
Col0_2x	2	-p	1	1	1	30.208
Col0_2x	2	-p	1	1	2	26.559
Col0_2x	2	-p	1	1	3	33.031
Col0_2x	2	-p	1	2	1	34.76
Col0_2x	2	-p	1	2	2	43.057
Col0_2x	2	-p	1	2	3	48.021
Col0_2x	2	-p	1	3	1	36.267
Col0_2x	2	-p	1	3	2	35.145
Col0_2x	2	-p	1	3	3	34.341
Col0_2x	2	-p	1	4	1	42.297
Col0_2x	2	-p	1	4	2	42.536
Col0_2x	2	-p	1	4	3	41.816
Col0_2x	2	-p	2	1	1	27.639
Col0_2x	2	-p	2	1	2	29.072
Col0_2x	2	-p	2	1	3	31.15
Col0_2x	2	-p	2	2	1	25.205
Col0_2x	2	-p	2	2	2	36.673
Col0_2x	2	-p	2	2	3	34.011
Col0_2x	2	-p	2	3	1	33.74
Col0_2x	2	-p	2	3	2	34.25
Col0_2x	2	-p	2	3	3	33.07
Col0_2x	2	-p	2	4	1	24.53
Col0_2x	2	-p	2	4	2	30.21
Col0_2x	2	-p	2	4	3	30.416
Col0_2x	2	+p	1	1	1	43.81
Col0_2x	2	+p	1	1	2	45.564
Col0_2x	2	+p	1	1	3	38.294
Col0_2x	2	+p	1	2	1	28.922
Col0_2x	2	+p	1	2	2	27.598
Col0_2x	2	+p	1	2	3	20.22
Col0_2x	2	+p	1	3	1	29.605
Col0_2x	2	+p	1	3	2	27.564
Col0_2x	2	+p	1	3	3	28.133
Col0_2x	2	+p	1	4	1	34.872
Col0_2x	2	+p	1	4	2	34.77
Col0_2x	2	+p	1	4	3	29.766
Col0_2x	2	+p	2	1	1	27.201
Col0_2x	2	+p	2	1	2	24.679
Col0_2x	2	+p	2	1	3	21.873
Col0_2x	2	+p	2	2	1	32.442
Col0_2x	2	+p	2	2	2	31.745
Col0_2x	2	+p	2	2	3	30.933
Col0_2x	2	+p	2	3	1	35.214
Col0_2x	2	+p	2	3	2	33.138
Col0_2x	2	+p	2	3	3	41.982
Col0_2x	2	+p	2	4	1	36.307
Col0_2x	2	+p	2	4	2	41.054
Col0_2x	2	+p	2	4	3	31.381
Col0_4x	2	-p	1	1	1	30.655
Col0_4x	2	-p	1	1	2	36.062
Col0_4x	2	-p	1	1	3	35.78
Col0_4x	2	-p	1	2	1	32.65
Col0_4x	2	-p	1	2	2	40.941
Col0_4x	2	-p	1	2	3	30.399
Col0_4x	2	-p	1	3	1	32.325
Col0_4x	2	-p	1	3	2	42.442
Col0_4x	2	-p	1	3	3	41.194
Col0_4x	2	-p	1	4	1	43.512
Col0_4x	2	-p	1	4	2	36.01
Col0_4x	2	-p	1	4	3	36.556
Col0_4x	2	-p	2	1	1	48.989
Col0_4x	2	-p	2	1	2	34.051
Col0_4x	2	-p	2	1	3	35.987
Col0_4x	2	-p	2	2	1	39.384
Col0_4x	2	-p	2	2	2	46.328
Col0_4x	2	-p	2	2	3	36.867
Col0_4x	2	-p	2	3	1	45.021
Col0_4x	2	-p	2	3	2	35.879
Col0_4x	2	-p	2	3	3	34.161
Col0_4x	2	-p	2	4	1	40.626
Col0_4x	2	-p	2	4	2	45.379
Col0_4x	2	-p	2	4	3	33.593
Col0_4x	2	+p	1	1	1	30.581
Col0_4x	2	+p	1	1	2	41.024
Col0_4x	2	+p	1	1	3	32.011
Col0_4x	2	+p	1	2	1	36.398
Col0_4x	2	+p	1	2	2	45.534
Col0_4x	2	+p	1	2	3	47.786
Col0_4x	2	+p	1	3	1	28.74
Col0_4x	2	+p	1	3	2	28.575
Col0_4x	2	+p	1	3	3	34.834
Col0_4x	2	+p	1	4	1	38.853
Col0_4x	2	+p	1	4	2	34.553
Col0_4x	2	+p	1	4	3	37.38
Col0_4x	2	+p	2	1	1	32.325
Col0_4x	2	+p	2	1	2	30.51
Col0_4x	2	+p	2	1	3	36.564
Col0_4x	2	+p	2	2	1	34.807
Col0_4x	2	+p	2	2	2	45.865
Col0_4x	2	+p	2	2	3	34.538
Col0_4x	2	+p	2	3	1	34.1
Col0_4x	2	+p	2	3	2	33.005
Col0_4x	2	+p	2	3	3	37.071
Col0_4x	2	+p	2	4	1	33.057
Col0_4x	2	+p	2	4	2	37.757
Col0_4x	2	+p	2	4	3	40.685
Ga1	1	-p	1	1	1	46.957
Ga1	1	-p	1	1	2	41.692
Ga1	1	-p	1	1	3	29.776
Ga1	1	-p	1	2	1	26.749
Ga1	1	-p	1	2	2	20.236
Ga1	1	-p	1	2	3	26.159
Ga1	1	-p	1	3	1	35.923
Ga1	1	-p	1	3	2	27.612
Ga1	1	-p	1	3	3	32.189
Ga1	1	-p	1	4	1	32.654
Ga1	1	-p	1	4	2	41.618
Ga1	1	-p	1	4	3	39.835
Ga1	1	-p	1	5	1	37.064
Ga1	1	-p	1	5	2	32.036
Ga1	1	-p	1	5	3	28.131
Ga1	1	-p	2	1	1	30.113
Ga1	1	-p	2	1	2	22.442
Ga1	1	-p	2	1	3	21.982
Ga1	1	-p	2	2	1	37.351
Ga1	1	-p	2	2	2	40.437
Ga1	1	-p	2	2	3	33.055
Ga1	1	-p	2	3	1	39.133
Ga1	1	-p	2	3	2	41.325
Ga1	1	-p	2	3	3	31.392
Ga1	1	-p	2	4	1	37.535
Ga1	1	-p	2	4	2	50.226
Ga1	1	-p	2	4	3	43.844
Ga1	1	-p	2	5	1	45.927
Ga1	1	-p	2	5	2	50.787
Ga1	1	-p	2	5	3	44.901
Ga1	1	+p	1	1	1	32.655
Ga1	1	+p	1	1	2	38.939
Ga1	1	+p	1	1	3	38.776
Ga1	1	+p	1	2	1	33.046
Ga1	1	+p	1	2	2	36.168
Ga1	1	+p	1	2	3	27.806
Ga1	1	+p	1	3	1	28.085
Ga1	1	+p	1	3	2	28.618
Ga1	1	+p	1	3	3	26.416
Ga1	1	+p	1	4	1	43.585
Ga1	1	+p	1	4	2	33.759
Ga1	1	+p	1	4	3	38.859
Ga1	1	+p	1	5	1	29.38
Ga1	1	+p	1	5	2	35.817
Ga1	1	+p	1	5	3	40.276
Ga1	1	+p	2	1	1	36.431
Ga1	1	+p	2	1	2	47.55
Ga1	1	+p	2	1	3	39.711
Ga1	1	+p	2	2	1	36.346
Ga1	1	+p	2	2	2	39.449
Ga1	1	+p	2	2	3	29.492
Ga1	1	+p	2	3	1	45.443
Ga1	1	+p	2	3	2	46.989
Ga1	1	+p	2	3	3	45.931
Ga1	1	+p	2	4	1	52.793
Ga1	1	+p	2	4	2	45.913
Ga1	1	+p	2	4	3	32.942
Ga1	1	+p	2	5	1	33.922
Ga1	1	+p	2	5	2	38.066
Ga1	1	+p	2	5	3	32.295
Ga1	2	-p	1	1	1	45.587
Ga1	2	-p	1	1	2	44.942
Ga1	2	-p	1	1	3	49.65
Ga1	2	-p	1	2	1	40.24
Ga1	2	-p	1	2	2	36.976
Ga1	2	-p	1	2	3	34.129
Ga1	2	-p	1	3	1	35.898
Ga1	2	-p	1	3	2	33.523
Ga1	2	-p	1	3	3	38.226
Ga1	2	-p	1	4	1	37.352
Ga1	2	-p	1	4	2	30.011
Ga1	2	-p	1	4	3	25.159
Ga1	2	-p	2	1	1	39.087
Ga1	2	-p	2	1	2	47.254
Ga1	2	-p	2	1	3	44.272
Ga1	2	-p	2	2	1	45.245
Ga1	2	-p	2	2	2	44.56
Ga1	2	-p	2	2	3	44.802
Ga1	2	-p	2	3	1	37.965
Ga1	2	-p	2	3	2	42.902
Ga1	2	-p	2	3	3	30.258
Ga1	2	-p	2	4	1	39.237
Ga1	2	-p	2	4	2	39.737
Ga1	2	-p	2	4	3	37.597
Ga1	2	+p	1	1	1	25.725
Ga1	2	+p	1	1	2	35.594
Ga1	2	+p	1	1	3	31.15
Ga1	2	+p	1	2	1	28.788
Ga1	2	+p	1	2	2	35.998
Ga1	2	+p	1	2	3	36.24
Ga1	2	+p	1	3	1	40.879
Ga1	2	+p	1	3	2	48.61
Ga1	2	+p	1	3	3	38.49
Ga1	2	+p	1	4	1	42.101
Ga1	2	+p	1	4	2	38.707
Ga1	2	+p	1	4	3	41.133
Ga1	2	+p	2	1	1	53
Ga1	2	+p	2	1	2	45.463
Ga1	2	+p	2	1	3	34.729
Ga1	2	+p	2	2	1	32.036
Ga1	2	+p	2	2	2	30.133
Ga1	2	+p	2	2	3	28.466
Ga1	2	+p	2	3	1	41.507
Ga1	2	+p	2	3	2	41.388
Ga1	2	+p	2	3	3	32.639
Ga1	2	+p	2	4	1	33.338
Ga1	2	+p	2	4	2	30.753
Ga1	2	+p	2	4	3	35.792
Kondara	1	-p	1	1	1	28.315
Kondara	1	-p	1	1	2	29.674
Kondara	1	-p	1	1	3	25.113
Kondara	1	-p	1	2	1	33.685
Kondara	1	-p	1	2	2	25.436
Kondara	1	-p	1	2	3	26.055
Kondara	1	-p	1	3	1	26.177
Kondara	1	-p	1	3	2	21.931
Kondara	1	-p	1	3	3	33.549
Kondara	1	-p	1	4	1	31.392
Kondara	1	-p	1	4	2	33.301
Kondara	1	-p	1	4	3	33.307
Kondara	1	-p	1	5	1	32.681
Kondara	1	-p	1	5	2	31.742
Kondara	1	-p	1	5	3	31.089
Kondara	1	-p	2	1	1	28.369
Kondara	1	-p	2	1	2	29.528
Kondara	1	-p	2	1	3	28.345
Kondara	1	-p	2	2	1	45.345
Kondara	1	-p	2	2	2	49.161
Kondara	1	-p	2	2	3	41.596
Kondara	1	-p	2	3	1	29.324
Kondara	1	-p	2	3	2	35.738
Kondara	1	-p	2	3	3	33.044
Kondara	1	-p	2	4	1	30.661
Kondara	1	-p	2	4	2	30.417
Kondara	1	-p	2	4	3	22.391
Kondara	1	-p	2	5	1	30.248
Kondara	1	-p	2	5	2	33.05
Kondara	1	-p	2	5	3	28.888
Kondara	1	+p	1	1	1	27.61
Kondara	1	+p	1	1	2	26.95
Kondara	1	+p	1	1	3	32.28
Kondara	1	+p	1	2	1	27.044
Kondara	1	+p	1	2	2	26.724
Kondara	1	+p	1	2	3	34.373
Kondara	1	+p	1	3	1	30.248
Kondara	1	+p	1	3	2	41.029
Kondara	1	+p	1	3	3	32.675
Kondara	1	+p	1	4	1	28.593
Kondara	1	+p	1	4	2	29.134
Kondara	1	+p	1	4	3	31.694
Kondara	1	+p	1	5	1	32.493
Kondara	1	+p	1	5	2	34.351
Kondara	1	+p	1	5	3	28.752
Kondara	1	+p	2	1	1	35.081
Kondara	1	+p	2	1	2	36.58
Kondara	1	+p	2	1	3	34.911
Kondara	1	+p	2	2	1	28.842
Kondara	1	+p	2	2	2	28.995
Kondara	1	+p	2	2	3	27.472
Kondara	1	+p	2	3	1	29.496
Kondara	1	+p	2	3	2	36.515
Kondara	1	+p	2	3	3	38.714
Kondara	1	+p	2	4	1	26.347
Kondara	1	+p	2	4	2	19.468
Kondara	1	+p	2	4	3	27.861
Kondara	1	+p	2	5	1	35.011
Kondara	1	+p	2	5	2	42.336
Kondara	1	+p	2	5	3	29.393
Kondara	2	-p	1	1	1	27.015
Kondara	2	-p	1	1	2	36.904
Kondara	2	-p	1	1	3	32.099
Kondara	2	-p	1	2	1	20.861
Kondara	2	-p	1	2	2	31.155
Kondara	2	-p	1	2	3	30.598
Kondara	2	-p	1	3	1	22.872
Kondara	2	-p	1	3	2	27.059
Kondara	2	-p	1	3	3	25.499
Kondara	2	-p	1	4	1	27.76
Kondara	2	-p	1	4	2	30.282
Kondara	2	-p	1	4	3	31.111
Kondara	2	-p	2	1	1	32.178
Kondara	2	-p	2	1	2	31.069
Kondara	2	-p	2	1	3	35.945
Kondara	2	-p	2	2	1	34.017
Kondara	2	-p	2	2	2	35.424
Kondara	2	-p	2	2	3	34.072
Kondara	2	-p	2	3	1	38.571
Kondara	2	-p	2	3	2	31.179
Kondara	2	-p	2	3	3	35.209
Kondara	2	-p	2	4	1	25.428
Kondara	2	-p	2	4	2	32.857
Kondara	2	-p	2	4	3	32.003
Kondara	2	+p	1	1	1	32.15
Kondara	2	+p	1	1	2	32.45
Kondara	2	+p	1	1	3	25.268
Kondara	2	+p	1	2	1	34.364
Kondara	2	+p	1	2	2	27.818
Kondara	2	+p	1	2	3	36.895
Kondara	2	+p	1	3	1	32.699
Kondara	2	+p	1	3	2	40.075
Kondara	2	+p	1	3	3	31.797
Kondara	2	+p	1	4	1	30.328
Kondara	2	+p	1	4	2	34.201
Kondara	2	+p	1	4	3	26.866
Kondara	2	+p	2	1	1	29.425
Kondara	2	+p	2	1	2	38.489
Kondara	2	+p	2	1	3	41.382
Kondara	2	+p	2	2	1	35.79
Kondara	2	+p	2	2	2	40.409
Kondara	2	+p	2	2	3	37.06
Kondara	2	+p	2	3	1	32.483
Kondara	2	+p	2	3	2	32.019
Kondara	2	+p	2	3	3	25.882
Kondara	2	+p	2	4	1	29.082
Kondara	2	+p	2	4	2	33.333
Kondara	2	+p	2	4	3	31.324
WRKY6	2	-p	1	1	1	26.537
WRKY6	2	-p	1	1	2	30.537
WRKY6	2	-p	1	1	3	36.425
WRKY6	2	-p	1	2	1	26.563
WRKY6	2	-p	1	2	2	21.323
WRKY6	2	-p	1	2	3	27.003
WRKY6	2	-p	1	3	1	23.932
WRKY6	2	-p	1	3	2	27.439
WRKY6	2	-p	1	3	3	24.159
WRKY6	2	-p	1	4	1	21.357
WRKY6	2	-p	1	4	2	20.058
WRKY6	2	-p	1	4	3	22.067
WRKY6	2	-p	2	1	1	34.432
WRKY6	2	-p	2	1	2	36.815
WRKY6	2	-p	2	1	3	38.978
WRKY6	2	-p	2	2	1	32.52
WRKY6	2	-p	2	2	2	31.973
WRKY6	2	-p	2	2	3	28.968
WRKY6	2	-p	2	3	1	19.532
WRKY6	2	-p	2	3	2	21.357
WRKY6	2	-p	2	3	3	20.071
WRKY6	2	-p	2	4	1	27.967
WRKY6	2	-p	2	4	2	17.889
WRKY6	2	-p	2	4	3	28.668
WRKY6	2	+p	1	1	1	31.34
WRKY6	2	+p	1	1	2	24.723
WRKY6	2	+p	1	1	3	28.946
WRKY6	2	+p	1	2	1	31.233
WRKY6	2	+p	1	2	2	35.478
WRKY6	2	+p	1	2	3	30.159
WRKY6	2	+p	1	3	1	35.535
WRKY6	2	+p	1	3	2	39.669
WRKY6	2	+p	1	3	3	27.95
WRKY6	2	+p	1	4	1	27.749
WRKY6	2	+p	1	4	2	27.875
WRKY6	2	+p	1	4	3	25.844
WRKY6	2	+p	2	1	1	28.009
WRKY6	2	+p	2	1	2	29.909
WRKY6	2	+p	2	1	3	31.07
WRKY6	2	+p	2	2	1	23.323
WRKY6	2	+p	2	2	2	24.851
WRKY6	2	+p	2	2	3	30.625
WRKY6	2	+p	2	3	1	26.658
WRKY6	2	+p	2	3	2	31.557
WRKY6	2	+p	2	3	3	17.133
WRKY6	2	+p	2	4	1	22.011
WRKY6	2	+p	2	4	2	26.179
WRKY6	2	+p	2	4	3	18.483

## Sheet: epicelldia
name	run	trt	rep	plant	cell	epicelldia
Col0_2x	1	-p	1	1	1	7.452
Col0_2x	1	-p	1	1	2	11.085
Col0_2x	1	-p	1	1	3	14.001
Col0_2x	1	-p	1	1	4	15.948
Col0_2x	1	-p	1	1	5	14.953
Col0_2x	1	-p	1	1	6	25.179
Col0_2x	1	-p	1	1	7	14.844
Col0_2x	1	-p	1	1	8	21.584
Col0_2x	1	-p	1	1	9	11.328
Col0_2x	1	-p	1	1	10	12.25
Col0_2x	1	-p	1	2	1	14.609
Col0_2x	1	-p	1	2	2	7.546
Col0_2x	1	-p	1	2	3	19.116
Col0_2x	1	-p	1	2	4	15.017
Col0_2x	1	-p	1	2	5	13.867
Col0_2x	1	-p	1	2	6	16.018
Col0_2x	1	-p	1	2	7	14.803
Col0_2x	1	-p	1	2	8	14.643
Col0_2x	1	-p	1	2	9	15.269
Col0_2x	1	-p	1	2	10	12.498
Col0_2x	1	-p	1	2	11	12.87
Col0_2x	1	-p	1	3	1	15.691
Col0_2x	1	-p	1	3	2	13.051
Col0_2x	1	-p	1	3	3	14.082
Col0_2x	1	-p	1	3	4	18.822
Col0_2x	1	-p	1	3	5	16.11
Col0_2x	1	-p	1	3	6	11.021
Col0_2x	1	-p	1	3	7	17.387
Col0_2x	1	-p	1	3	8	10.941
Col0_2x	1	-p	1	3	9	9.256
Col0_2x	1	-p	1	3	10	8.937
Col0_2x	1	-p	1	3	11	12.269
Col0_2x	1	-p	1	4	1	9.079
Col0_2x	1	-p	1	4	2	6.909
Col0_2x	1	-p	1	4	3	11.038
Col0_2x	1	-p	1	4	4	9.649
Col0_2x	1	-p	1	4	5	11.783
Col0_2x	1	-p	1	4	6	15.281
Col0_2x	1	-p	1	4	7	12.843
Col0_2x	1	-p	1	4	8	11.589
Col0_2x	1	-p	1	4	9	14.783
Col0_2x	1	-p	1	4	10	13.268
Col0_2x	1	-p	1	5	1	10.926
Col0_2x	1	-p	1	5	2	10.083
Col0_2x	1	-p	1	5	3	17.326
Col0_2x	1	-p	1	5	4	15.072
Col0_2x	1	-p	1	5	5	14.347
Col0_2x	1	-p	1	5	6	16.273
Col0_2x	1	-p	1	5	7	15.536
Col0_2x	1	-p	1	5	8	14.997
Col0_2x	1	-p	1	5	9	9.722
Col0_2x	1	-p	1	5	10	9.57
Col0_2x	1	-p	1	5	11	13.428
Col0_2x	1	-p	2	1	1	9.597
Col0_2x	1	-p	2	1	2	7.308
Col0_2x	1	-p	2	1	3	8.307
Col0_2x	1	-p	2	1	4	10.031
Col0_2x	1	-p	2	1	5	13.109
Col0_2x	1	-p	2	1	6	10.217
Col0_2x	1	-p	2	1	7	13.159
Col0_2x	1	-p	2	1	8	15.082
Col0_2x	1	-p	2	1	9	12.782
Col0_2x	1	-p	2	1	10	11.456
Col0_2x	1	-p	2	1	11	10.707
Col0_2x	1	-p	2	2	1	16.762
Col0_2x	1	-p	2	2	2	16.535
Col0_2x	1	-p	2	2	3	12.76
Col0_2x	1	-p	2	2	4	12.545
Col0_2x	1	-p	2	2	5	12.843
Col0_2x	1	-p	2	2	6	12.722
Col0_2x	1	-p	2	2	7	13.132
Col0_2x	1	-p	2	2	8	12.298
Col0_2x	1	-p	2	2	9	11.356
Col0_2x	1	-p	2	3	1	8.614
Col0_2x	1	-p	2	3	2	10.661
Col0_2x	1	-p	2	3	3	10.22
Col0_2x	1	-p	2	3	4	20.514
Col0_2x	1	-p	2	3	5	11.18
Col0_2x	1	-p	2	3	6	15.87
Col0_2x	1	-p	2	3	7	15.386
Col0_2x	1	-p	2	3	8	12.609
Col0_2x	1	-p	2	3	9	13.067
Col0_2x	1	-p	2	3	10	13.089
Col0_2x	1	-p	2	4	1	8.7
Col0_2x	1	-p	2	4	2	9.004
Col0_2x	1	-p	2	4	3	11.538
Col0_2x	1	-p	2	4	4	9.465
Col0_2x	1	-p	2	4	5	11.216
Col0_2x	1	-p	2	4	6	14.93
Col0_2x	1	-p	2	4	7	14.259
Col0_2x	1	-p	2	4	8	11.342
Col0_2x	1	-p	2	4	9	14.321
Col0_2x	1	-p	2	4	10	12.767
Col0_2x	1	-p	2	5	1	8.753
Col0_2x	1	-p	2	5	2	13.417
Col0_2x	1	-p	2	5	3	15.435
Col0_2x	1	-p	2	5	4	16.049
Col0_2x	1	-p	2	5	5	17.025
Col0_2x	1	-p	2	5	6	19.014
Col0_2x	1	-p	2	5	7	11.861
Col0_2x	1	-p	2	5	8	13.475
Col0_2x	1	-p	2	5	9	11.893
Col0_2x	1	-p	2	5	10	12.391
Col0_2x	1	+p	1	1	1	13.079
Col0_2x	1	+p	1	1	2	11.256
Col0_2x	1	+p	1	1	3	12.383
Col0_2x	1	+p	1	1	4	16.613
Col0_2x	1	+p	1	1	5	15.984
Col0_2x	1	+p	1	1	6	10.666
Col0_2x	1	+p	1	1	7	13.336
Col0_2x	1	+p	1	1	8	13.428
Col0_2x	1	+p	1	1	9	11.983
Col0_2x	1	+p	1	1	10	9.915
Col0_2x	1	+p	1	2	1	12.374
Col0_2x	1	+p	1	2	2	8.979
Col0_2x	1	+p	1	2	3	13.004
Col0_2x	1	+p	1	2	4	11.481
Col0_2x	1	+p	1	2	5	15.471
Col0_2x	1	+p	1	2	6	14.097
Col0_2x	1	+p	1	2	7	11.163
Col0_2x	1	+p	1	2	8	13.955
Col0_2x	1	+p	1	2	9	12.663
Col0_2x	1	+p	1	2	10	17.051
Col0_2x	1	+p	1	2	11	13.867
Col0_2x	1	+p	1	3	1	12.843
Col0_2x	1	+p	1	3	2	14.837
Col0_2x	1	+p	1	3	3	17.97
Col0_2x	1	+p	1	3	4	14.577
Col0_2x	1	+p	1	3	5	12.174
Col0_2x	1	+p	1	3	6	17.311
Col0_2x	1	+p	1	3	7	16.909
Col0_2x	1	+p	1	3	8	13.161
Col0_2x	1	+p	1	3	9	15.186
Col0_2x	1	+p	1	4	1	11.095
Col0_2x	1	+p	1	4	2	9.568
Col0_2x	1	+p	1	4	3	10.619
Col0_2x	1	+p	1	4	4	18.049
Col0_2x	1	+p	1	4	5	13.06
Col0_2x	1	+p	1	4	6	11.813
Col0_2x	1	+p	1	4	7	12.45
Col0_2x	1	+p	1	4	8	13.893
Col0_2x	1	+p	1	4	9	14.13
Col0_2x	1	+p	1	5	1	11.121
Col0_2x	1	+p	1	5	2	13.652
Col0_2x	1	+p	1	5	3	18.087
Col0_2x	1	+p	1	5	4	10.392
Col0_2x	1	+p	1	5	5	13.515
Col0_2x	1	+p	1	5	6	14.242
Col0_2x	1	+p	1	5	7	12.795
Col0_2x	1	+p	1	5	8	10.493
Col0_2x	1	+p	1	5	9	10.617
Col0_2x	2	-p	1	1	1	16.515
Col0_2x	2	-p	1	1	2	12.629
Col0_2x	2	-p	1	1	3	13.099
Col0_2x	2	-p	1	1	4	14.826
Col0_2x	2	-p	1	1	5	17.596
Col0_2x	2	-p	1	1	6	17.313
Col0_2x	2	-p	1	1	7	15.016
Col0_2x	2	-p	1	1	8	18.015
Col0_2x	2	-p	1	1	9	15.571
Col0_2x	2	-p	1	2	1	7.541
Col0_2x	2	-p	1	2	2	11.546
Col0_2x	2	-p	1	2	3	10.445
Col0_2x	2	-p	1	2	4	13.512
Col0_2x	2	-p	1	2	5	13.741
Col0_2x	2	-p	1	2	6	11.464
Col0_2x	2	-p	1	2	7	14.232
Col0_2x	2	-p	1	2	8	16.194
Col0_2x	2	-p	1	2	9	13.713
Col0_2x	2	-p	1	2	10	16.601
Col0_2x	2	-p	1	2	11	11.29
Col0_2x	2	-p	1	2	12	16.494
Col0_2x	2	-p	1	2	13	13.741
Col0_2x	2	-p	1	2	14	14.175
Col0_2x	2	-p	1	3	1	12.485
Col0_2x	2	-p	1	3	2	14.622
Col0_2x	2	-p	1	3	3	14.987
Col0_2x	2	-p	1	3	4	16.911
Col0_2x	2	-p	1	3	5	11.113
Col0_2x	2	-p	1	3	6	11.383
Col0_2x	2	-p	1	3	7	15.679
Col0_2x	2	-p	1	3	8	17.094
Col0_2x	2	-p	1	3	9	13.51
Col0_2x	2	-p	1	3	10	16.622
Col0_2x	2	-p	1	3	11	14.443
Col0_2x	2	-p	1	4	1	11.439
Col0_2x	2	-p	1	4	2	13.05
Col0_2x	2	-p	1	4	3	13.985
Col0_2x	2	-p	1	4	4	16.881
Col0_2x	2	-p	1	4	5	15.776
Col0_2x	2	-p	1	4	6	21.194
Col0_2x	2	-p	1	4	7	18.011
Col0_2x	2	-p	1	4	8	18.235
Col0_2x	2	-p	1	4	9	13.05
Col0_2x	2	-p	1	4	10	11.275
Col0_2x	2	-p	1	4	11	13.937
Col0_2x	2	-p	1	4	12	13.962
Col0_2x	2	-p	2	1	1	13.426
Col0_2x	2	-p	2	1	2	13.066
Col0_2x	2	-p	2	1	3	15.779
Col0_2x	2	-p	2	1	4	15.4
Col0_2x	2	-p	2	1	5	18.003
Col0_2x	2	-p	2	1	6	16.232
Col0_2x	2	-p	2	1	7	19.575
Col0_2x	2	-p	2	1	8	12.597
Col0_2x	2	-p	2	2	1	11.457
Col0_2x	2	-p	2	2	2	11.76
Col0_2x	2	-p	2	2	3	13.944
Col0_2x	2	-p	2	2	4	11.96
Col0_2x	2	-p	2	2	5	11.767
Col0_2x	2	-p	2	2	6	20.586
Col0_2x	2	-p	2	2	7	16.986
Col0_2x	2	-p	2	2	8	19.773
Col0_2x	2	-p	2	2	9	17.622
Col0_2x	2	-p	2	2	10	12.327
Col0_2x	2	-p	2	3	1	11.76
Col0_2x	2	-p	2	3	2	13.509
Col0_2x	2	-p	2	3	3	13.332
Col0_2x	2	-p	2	3	4	12.698
Col0_2x	2	-p	2	3	5	13.669
Col0_2x	2	-p	2	3	6	10.757
Col0_2x	2	-p	2	3	7	13.361
Col0_2x	2	-p	2	3	8	11.76
Col0_2x	2	-p	2	3	9	18.116
Col0_2x	2	-p	2	3	10	11.432
Col0_2x	2	-p	2	3	11	9.321
Col0_2x	2	-p	2	4	1	16.751
Col0_2x	2	-p	2	4	2	15.455
Col0_2x	2	-p	2	4	3	17.509
Col0_2x	2	-p	2	4	4	14.521
Col0_2x	2	-p	2	4	5	17.638
Col0_2x	2	-p	2	4	6	15.842
Col0_2x	2	-p	2	4	7	18.004
Col0_2x	2	-p	2	4	8	12.539
Col0_2x	2	-p	2	4	9	11.324
Col0_2x	2	+p	1	1	1	11.905
Col0_2x	2	+p	1	1	2	13.47
Col0_2x	2	+p	1	1	3	12.539
Col0_2x	2	+p	1	1	4	13.634
Col0_2x	2	+p	1	1	5	13.079
Col0_2x	2	+p	1	1	6	15.235
Col0_2x	2	+p	1	1	7	10.47
Col0_2x	2	+p	1	1	8	13.758
Col0_2x	2	+p	1	1	9	9.91
Col0_2x	2	+p	1	1	10	14.204
Col0_2x	2	+p	1	1	11	15.057
Col0_2x	2	+p	1	1	12	12.985
Col0_2x	2	+p	1	1	13	15.392
Col0_2x	2	+p	1	1	14	9.582
Col0_2x	2	+p	1	1	15	9.364
Col0_2x	2	+p	1	2	1	10.266
Col0_2x	2	+p	1	2	2	15.717
Col0_2x	2	+p	1	2	3	11.409
Col0_2x	2	+p	1	2	4	16.271
Col0_2x	2	+p	1	2	5	13.523
Col0_2x	2	+p	1	2	6	11.56
Col0_2x	2	+p	1	2	7	15.356
Col0_2x	2	+p	1	2	8	13.156
Col0_2x	2	+p	1	3	1	8.496
Col0_2x	2	+p	1	3	2	11.251
Col0_2x	2	+p	1	3	3	11.399
Col0_2x	2	+p	1	3	4	15.59
Col0_2x	2	+p	1	3	5	7.11
Col0_2x	2	+p	1	3	6	13.291
Col0_2x	2	+p	1	3	7	11.61
Col0_2x	2	+p	1	3	8	16.121
Col0_2x	2	+p	1	3	9	11.76
Col0_2x	2	+p	1	3	10	11.993
Col0_2x	2	+p	1	3	11	11.324
Col0_2x	2	+p	1	4	1	11.979
Col0_2x	2	+p	1	4	2	9.877
Col0_2x	2	+p	1	4	3	8.623
Col0_2x	2	+p	1	4	4	14.267
Col0_2x	2	+p	1	4	5	13.634
Col0_2x	2	+p	1	4	6	16.187
Col0_2x	2	+p	1	4	7	13.966
Col0_2x	2	+p	1	4	8	16.781
Col0_2x	2	+p	1	4	9	11.979
Col0_2x	2	+p	1	4	10	15.258
Col0_2x	2	+p	1	4	11	10.159
Col0_2x	2	+p	1	4	12	11.242
Col0_2x	2	+p	2	1	1	10.889
Col0_2x	2	+p	2	1	2	15.343
Col0_2x	2	+p	2	1	3	15.208
Col0_2x	2	+p	2	1	4	14.25
Col0_2x	2	+p	2	1	5	15.463
Col0_2x	2	+p	2	1	6	15.053
Col0_2x	2	+p	2	1	7	17.859
Col0_2x	2	+p	2	1	8	14.694
Col0_2x	2	+p	2	2	1	16.528
Col0_2x	2	+p	2	2	2	13.594
Col0_2x	2	+p	2	2	3	17.673
Col0_2x	2	+p	2	2	4	17.292
Col0_2x	2	+p	2	2	5	20.294
Col0_2x	2	+p	2	2	6	17.996
Col0_2x	2	+p	2	2	7	15.909
Col0_2x	2	+p	2	2	8	13.638
Col0_2x	2	+p	2	3	1	11.068
Col0_2x	2	+p	2	3	2	11.034
Col0_2x	2	+p	2	3	3	14.425
Col0_2x	2	+p	2	3	4	12.125
Col0_2x	2	+p	2	3	5	12.62
Col0_2x	2	+p	2	3	6	13.65
Col0_2x	2	+p	2	3	7	11.037
Col0_2x	2	+p	2	3	8	11.766
Col0_2x	2	+p	2	3	9	17.714
Col0_2x	2	+p	2	3	10	15.235
Col0_2x	2	+p	2	3	11	11.383
Col0_2x	2	+p	2	3	12	14.579
Col0_2x	2	+p	2	3	13	12.861
Col0_2x	2	+p	2	4	1	7.625
Col0_2x	2	+p	2	4	2	10.07
Col0_2x	2	+p	2	4	3	10.757
Col0_2x	2	+p	2	4	4	14.808
Col0_2x	2	+p	2	4	5	8.321
Col0_2x	2	+p	2	4	6	13.361
Col0_2x	2	+p	2	4	7	17.857
Col0_2x	2	+p	2	4	8	15.294
Col0_2x	2	+p	2	4	9	12.935
Col0_2x	2	+p	2	4	10	14.255
Col0_2x	2	+p	2	4	11	8.868
Col0_2x	2	+p	2	4	12	7.84
Col0_2x	2	+p	2	4	13	11.476
Col0_4x	2	-p	1	1	1	17.949
Col0_4x	2	-p	1	1	2	18.768
Col0_4x	2	-p	1	1	3	20.391
Col0_4x	2	-p	1	1	4	21.309
Col0_4x	2	-p	1	1	5	20.648
Col0_4x	2	-p	1	1	6	34.341
Col0_4x	2	-p	1	1	7	25.355
Col0_4x	2	-p	1	2	1	17.482
Col0_4x	2	-p	1	2	2	17.484
Col0_4x	2	-p	1	2	3	22.478
Col0_4x	2	-p	1	2	4	9.309
Col0_4x	2	-p	1	2	5	17.617
Col0_4x	2	-p	1	2	6	18.172
Col0_4x	2	-p	1	2	7	12.526
Col0_4x	2	-p	1	2	8	18.7
Col0_4x	2	-p	1	2	9	14.72
Col0_4x	2	-p	1	2	10	11.068
Col0_4x	2	-p	1	3	1	11.324
Col0_4x	2	-p	1	3	2	12.404
Col0_4x	2	-p	1	3	3	20.001
Col0_4x	2	-p	1	3	4	16.387
Col0_4x	2	-p	1	3	5	22.075
Col0_4x	2	-p	1	3	6	17.55
Col0_4x	2	-p	1	3	7	18.024
Col0_4x	2	-p	1	3	8	17.356
Col0_4x	2	-p	1	3	9	14.788
Col0_4x	2	-p	1	3	10	18.624
Col0_4x	2	-p	1	4	1	17.958
Col0_4x	2	-p	1	4	2	16.471
Col0_4x	2	-p	1	4	3	17.958
Col0_4x	2	-p	1	4	4	24.406
Col0_4x	2	-p	1	4	5	12.415
Col0_4x	2	-p	1	4	6	14.691
Col0_4x	2	-p	1	4	7	14.806
Col0_4x	2	-p	1	4	8	17.094
Col0_4x	2	-p	1	4	9	17.691
Col0_4x	2	-p	1	4	10	18.35
Col0_4x	2	-p	2	1	1	14.622
Col0_4x	2	-p	2	1	2	13.268
Col0_4x	2	-p	2	1	3	17.2
Col0_4x	2	-p	2	1	4	12.031
Col0_4x	2	-p	2	1	5	21.847
Col0_4x	2	-p	2	1	6	21.557
Col0_4x	2	-p	2	1	7	15.679
Col0_4x	2	-p	2	1	8	12.157
Col0_4x	2	-p	2	1	9	13.002
Col0_4x	2	-p	2	1	10	13.102
Col0_4x	2	-p	2	1	11	15.704
Col0_4x	2	-p	2	2	1	13.066
Col0_4x	2	-p	2	2	2	12.48
Col0_4x	2	-p	2	2	3	14.814
Col0_4x	2	-p	2	2	4	14.399
Col0_4x	2	-p	2	2	5	24.406
Col0_4x	2	-p	2	2	6	16.991
Col0_4x	2	-p	2	2	7	20.586
Col0_4x	2	-p	2	2	8	23.571
Col0_4x	2	-p	2	2	9	19.424
Col0_4x	2	-p	2	2	10	11.018
Col0_4x	2	-p	2	2	11	18.764
Col0_4x	2	-p	2	3	1	17.53
Col0_4x	2	-p	2	3	2	13.606
Col0_4x	2	-p	2	3	3	21.127
Col0_4x	2	-p	2	3	4	24.274
Col0_4x	2	-p	2	3	5	17.427
Col0_4x	2	-p	2	3	6	21.213
Col0_4x	2	-p	2	3	7	19.72
Col0_4x	2	-p	2	3	8	17.857
Col0_4x	2	-p	2	3	9	11.307
Col0_4x	2	-p	2	3	10	17.114
Col0_4x	2	-p	2	4	1	11.56
Col0_4x	2	-p	2	4	2	15.739
Col0_4x	2	-p	2	4	3	19.821
Col0_4x	2	-p	2	4	4	23.004
Col0_4x	2	-p	2	4	5	15.972
Col0_4x	2	-p	2	4	6	20.2
Col0_4x	2	-p	2	4	7	18.283
Col0_4x	2	-p	2	4	8	17.911
Col0_4x	2	-p	2	4	9	14.512
Col0_4x	2	-p	2	4	10	19.745
Col0_4x	2	+p	1	1	1	11.324
Col0_4x	2	+p	1	1	2	14.425
Col0_4x	2	+p	1	1	3	16.671
Col0_4x	2	+p	1	1	4	14.738
Col0_4x	2	+p	1	1	5	19.424
Col0_4x	2	+p	1	1	6	19.561
Col0_4x	2	+p	1	1	7	22.208
Col0_4x	2	+p	1	1	8	19.124
Col0_4x	2	+p	1	1	9	20.284
Col0_4x	2	+p	1	2	1	12.789
Col0_4x	2	+p	1	2	2	11.409
Col0_4x	2	+p	1	2	3	10.274
Col0_4x	2	+p	1	2	4	14.299
Col0_4x	2	+p	1	2	5	22.694
Col0_4x	2	+p	1	2	6	15.235
Col0_4x	2	+p	1	2	7	20.501
Col0_4x	2	+p	1	2	8	20.352
Col0_4x	2	+p	1	2	9	15.722
Col0_4x	2	+p	1	2	10	13.002
Col0_4x	2	+p	1	2	11	10.376
Col0_4x	2	+p	1	2	12	11.057
Col0_4x	2	+p	1	2	13	12.404
Col0_4x	2	+p	1	3	1	15.323
Col0_4x	2	+p	1	3	2	19.376
Col0_4x	2	+p	1	3	3	16.976
Col0_4x	2	+p	1	3	4	18.35
Col0_4x	2	+p	1	3	5	8.969
Col0_4x	2	+p	1	3	6	18.126
Col0_4x	2	+p	1	3	7	21.779
Col0_4x	2	+p	1	3	8	20.388
Col0_4x	2	+p	1	4	1	15.779
Col0_4x	2	+p	1	4	2	13.544
Col0_4x	2	+p	1	4	3	16.841
Col0_4x	2	+p	1	4	4	22.656
Col0_4x	2	+p	1	4	5	13.937
Col0_4x	2	+p	1	4	6	13.868
Col0_4x	2	+p	1	4	7	18.828
Col0_4x	2	+p	1	4	8	17.814
Col0_4x	2	+p	1	4	9	12.253
Col0_4x	2	+p	1	4	10	14.231
Col0_4x	2	+p	2	1	1	14.416
Col0_4x	2	+p	2	1	2	17.733
Col0_4x	2	+p	2	1	3	21.682
Col0_4x	2	+p	2	1	4	21.777
Col0_4x	2	+p	2	1	5	22.715
Col0_4x	2	+p	2	1	6	15.821
Col0_4x	2	+p	2	1	7	18.274
Col0_4x	2	+p	2	1	8	11.56
Col0_4x	2	+p	2	1	9	16.002
Col0_4x	2	+p	2	2	1	11.792
Col0_4x	2	+p	2	2	2	10.76
Col0_4x	2	+p	2	2	3	16.168
Col0_4x	2	+p	2	2	4	11.648
Col0_4x	2	+p	2	2	5	14.267
Col0_4x	2	+p	2	2	6	13.763
Col0_4x	2	+p	2	2	7	16.781
Col0_4x	2	+p	2	2	8	17.009
Col0_4x	2	+p	2	2	9	14.155
Col0_4x	2	+p	2	2	10	14.74
Col0_4x	2	+p	2	2	11	12.274
Col0_4x	2	+p	2	2	12	13.72
Col0_4x	2	+p	2	3	1	16.006
Col0_4x	2	+p	2	3	2	15.399
Col0_4x	2	+p	2	3	3	20.907
Col0_4x	2	+p	2	3	4	24.987
Col0_4x	2	+p	2	3	5	16.333
Col0_4x	2	+p	2	3	6	17.075
Col0_4x	2	+p	2	3	7	17.511
Col0_4x	2	+p	2	3	8	10.238
Col0_4x	2	+p	2	3	9	11.787
Col0_4x	2	+p	2	3	10	15.704
Col0_4x	2	+p	2	4	1	12.536
Col0_4x	2	+p	2	4	2	19.122
Col0_4x	2	+p	2	4	3	22.807
Col0_4x	2	+p	2	4	4	20.943
Col0_4x	2	+p	2	4	5	21.815
Col0_4x	2	+p	2	4	6	17.873
Col0_4x	2	+p	2	4	7	26.476
Col0_4x	2	+p	2	4	8	24.564
Ga1	1	-p	1	1	1	15.569
Ga1	1	-p	1	1	2	13.961
Ga1	1	-p	1	1	3	19.108
Ga1	1	-p	1	1	4	14.06
Ga1	1	-p	1	1	5	14.309
Ga1	1	-p	1	1	6	17.413
Ga1	1	-p	1	1	7	12.298
Ga1	1	-p	1	1	8	12.504
Ga1	1	-p	1	1	9	13.2
Ga1	1	-p	1	1	10	14.155
Ga1	1	-p	1	1	11	11.884
Ga1	1	-p	1	1	12	12.757
Ga1	1	-p	1	2	1	14.84
Ga1	1	-p	1	2	2	17.533
Ga1	1	-p	1	2	3	13.48
Ga1	1	-p	1	2	4	10.014
Ga1	1	-p	1	2	5	6.697
Ga1	1	-p	1	2	6	10.435
Ga1	1	-p	1	2	7	11.827
Ga1	1	-p	1	2	8	10.795
Ga1	1	-p	1	2	9	10.238
Ga1	1	-p	1	2	10	11.07
Ga1	1	-p	1	3	1	13.125
Ga1	1	-p	1	3	2	13.381
Ga1	1	-p	1	3	3	15.876
Ga1	1	-p	1	3	4	19.783
Ga1	1	-p	1	3	5	13.564
Ga1	1	-p	1	3	6	9.629
Ga1	1	-p	1	3	7	14.369
Ga1	1	-p	1	3	8	9.408
Ga1	1	-p	1	3	9	10.8
Ga1	1	-p	1	3	10	7.826
Ga1	1	-p	1	3	11	12.609
Ga1	1	-p	1	4	1	11.298
Ga1	1	-p	1	4	2	9.821
Ga1	1	-p	1	4	3	10.554
Ga1	1	-p	1	4	4	11.957
Ga1	1	-p	1	4	5	14.262
Ga1	1	-p	1	4	6	12.004
Ga1	1	-p	1	4	7	15.942
Ga1	1	-p	1	4	8	14.918
Ga1	1	-p	1	4	9	13.893
Ga1	1	-p	1	4	10	14.931
Ga1	1	-p	1	4	11	14.057
Ga1	1	-p	1	4	12	9.536
Ga1	1	-p	1	4	13	11.398
Ga1	1	-p	1	5	1	18.045
Ga1	1	-p	1	5	2	13.689
Ga1	1	-p	1	5	3	15.057
Ga1	1	-p	1	5	4	15.473
Ga1	1	-p	1	5	5	13.564
Ga1	1	-p	1	5	6	11.178
Ga1	1	-p	1	5	7	12.62
Ga1	1	-p	1	5	8	11.379
Ga1	1	-p	1	5	9	12.393
Ga1	1	-p	1	5	10	9.164
Ga1	1	-p	1	5	11	11.163
Ga1	1	-p	1	5	12	10.87
Ga1	1	-p	2	1	1	13.697
Ga1	1	-p	2	1	2	11.765
Ga1	1	-p	2	1	3	11.191
Ga1	1	-p	2	1	4	15.186
Ga1	1	-p	2	1	5	10.22
Ga1	1	-p	2	1	6	8.07
Ga1	1	-p	2	1	7	10.261
Ga1	1	-p	2	1	8	9.528
Ga1	1	-p	2	1	9	10.889
Ga1	1	-p	2	1	10	8.117
Ga1	1	-p	2	2	1	13.043
Ga1	1	-p	2	2	2	14.297
Ga1	1	-p	2	2	3	14.577
Ga1	1	-p	2	2	4	11.313
Ga1	1	-p	2	2	5	12.62
Ga1	1	-p	2	2	6	16.306
Ga1	1	-p	2	2	7	12.994
Ga1	1	-p	2	2	8	11.078
Ga1	1	-p	2	2	9	19.323
Ga1	1	-p	2	2	10	12.787
Ga1	1	-p	2	2	11	9.792
Ga1	1	-p	2	3	1	8.852
Ga1	1	-p	2	3	2	10.617
Ga1	1	-p	2	3	3	10.725
Ga1	1	-p	2	3	4	14.132
Ga1	1	-p	2	3	5	14.784
Ga1	1	-p	2	3	6	15.883
Ga1	1	-p	2	3	7	13.92
Ga1	1	-p	2	3	8	16.527
Ga1	1	-p	2	3	9	12.543
Ga1	1	-p	2	3	10	17.843
Ga1	1	-p	2	3	11	11.811
Ga1	1	-p	2	3	12	8.916
Ga1	1	-p	2	4	1	7.778
Ga1	1	-p	2	4	2	8.763
Ga1	1	-p	2	4	3	10.444
Ga1	1	-p	2	4	4	8.763
Ga1	1	-p	2	4	5	12.458
Ga1	1	-p	2	4	6	7.686
Ga1	1	-p	2	4	7	8.07
Ga1	1	-p	2	4	8	13.652
Ga1	1	-p	2	4	9	20.55
Ga1	1	-p	2	4	10	12.191
Ga1	1	-p	2	4	11	22.943
Ga1	1	-p	2	4	12	18.606
Ga1	1	-p	2	4	13	15.044
Ga1	1	-p	2	4	14	11.687
Ga1	1	-p	2	4	15	11.481
Ga1	1	-p	2	5	1	11.275
Ga1	1	-p	2	5	2	13.024
Ga1	1	-p	2	5	3	12.393
Ga1	1	-p	2	5	4	12.596
Ga1	1	-p	2	5	5	13.175
Ga1	1	-p	2	5	6	11.22
Ga1	1	-p	2	5	7	14.975
Ga1	1	-p	2	5	8	14.172
Ga1	1	-p	2	5	9	14.145
Ga1	1	-p	2	5	10	14.583
Ga1	1	-p	2	5	11	12.393
Ga1	1	-p	2	5	12	13.711
Ga1	1	-p	2	5	13	18.56
Ga1	1	-p	2	5	14	17.063
Ga1	1	-p	2	5	15	14.872
Ga1	1	+p	1	1	1	10.439
Ga1	1	+p	1	1	2	9.348
Ga1	1	+p	1	1	3	8.618
Ga1	1	+p	1	1	4	14.783
Ga1	1	+p	1	1	5	4.798
Ga1	1	+p	1	1	6	9.102
Ga1	1	+p	1	1	7	12.504
Ga1	1	+p	1	1	8	13.773
Ga1	1	+p	1	1	9	11.367
Ga1	1	+p	1	1	10	13.047
Ga1	1	+p	1	1	11	18.849
Ga1	1	+p	1	1	12	18.652
Ga1	1	+p	1	1	13	8.121
Ga1	1	+p	1	1	14	9.348
Ga1	1	+p	1	2	1	9.86
Ga1	1	+p	1	2	2	11.298
Ga1	1	+p	1	2	3	13.282
Ga1	1	+p	1	2	4	14.481
Ga1	1	+p	1	2	5	16.31
Ga1	1	+p	1	2	6	12.205
Ga1	1	+p	1	2	7	15.822
Ga1	1	+p	1	2	8	12.49
Ga1	1	+p	1	2	9	13.002
Ga1	1	+p	1	2	10	15.75
Ga1	1	+p	1	2	11	8.478
Ga1	1	+p	1	2	12	10.22
Ga1	1	+p	1	2	13	10.383
Ga1	1	+p	1	3	1	11.638
Ga1	1	+p	1	3	2	11.573
Ga1	1	+p	1	3	3	13.261
Ga1	1	+p	1	3	4	15.871
Ga1	1	+p	1	3	5	12.191
Ga1	1	+p	1	3	6	14.097
Ga1	1	+p	1	3	7	16.013
Ga1	1	+p	1	3	8	13.41
Ga1	1	+p	1	3	9	11.089
Ga1	1	+p	1	3	10	10.654
Ga1	1	+p	1	4	1	9.656
Ga1	1	+p	1	4	2	15.093
Ga1	1	+p	1	4	3	14.369
Ga1	1	+p	1	4	4	15.905
Ga1	1	+p	1	4	5	14.331
Ga1	1	+p	1	4	6	7.011
Ga1	1	+p	1	4	7	16.223
Ga1	1	+p	1	4	8	18.39
Ga1	1	+p	1	4	9	12.787
Ga1	1	+p	1	4	10	13.374
Ga1	1	+p	1	4	11	18.084
Ga1	1	+p	1	4	12	15.375
Ga1	1	+p	1	4	13	12.872
Ga1	1	+p	1	5	1	8.913
Ga1	1	+p	1	5	2	9.627
Ga1	1	+p	1	5	3	9.597
Ga1	1	+p	1	5	4	8.608
Ga1	1	+p	1	5	5	11.044
Ga1	1	+p	1	5	6	12.121
Ga1	1	+p	1	5	7	17.911
Ga1	1	+p	1	5	8	14.797
Ga1	1	+p	1	5	9	16.181
Ga1	1	+p	1	5	10	14.369
Ga1	1	+p	1	5	11	16.041
Ga1	1	+p	1	5	12	10.854
Ga1	1	+p	2	1	1	11.094
Ga1	1	+p	2	1	2	13.043
Ga1	1	+p	2	1	3	16.946
Ga1	1	+p	2	1	4	7.176
Ga1	1	+p	2	1	5	15.255
Ga1	1	+p	2	1	6	11.485
Ga1	1	+p	2	1	7	14.828
Ga1	1	+p	2	1	8	15.197
Ga1	1	+p	2	1	9	14.565
Ga1	1	+p	2	1	10	15.633
Ga1	1	+p	2	1	11	8.849
Ga1	1	+p	2	1	12	14.021
Ga1	1	+p	2	1	13	11.338
Ga1	1	+p	2	2	1	10.941
Ga1	1	+p	2	2	2	12.663
Ga1	1	+p	2	2	3	13.606
Ga1	1	+p	2	2	4	13.976
Ga1	1	+p	2	2	5	14.487
Ga1	1	+p	2	2	6	15.002
Ga1	1	+p	2	2	7	15.706
Ga1	1	+p	2	2	8	12.927
Ga1	1	+p	2	2	9	11.068
Ga1	1	+p	2	2	10	10.021
Ga1	1	+p	2	2	11	9.783
Ga1	1	+p	2	2	12	10.619
Ga1	1	+p	2	3	1	9.558
Ga1	1	+p	2	3	2	10.419
Ga1	1	+p	2	3	3	7.805
Ga1	1	+p	2	3	4	13.996
Ga1	1	+p	2	3	5	10.738
Ga1	1	+p	2	3	6	16.586
Ga1	1	+p	2	3	7	9.707
Ga1	1	+p	2	3	8	10.87
Ga1	1	+p	2	3	9	15.025
Ga1	1	+p	2	3	10	16.236
Ga1	1	+p	2	3	11	16.437
Ga1	1	+p	2	3	12	17.405
Ga1	1	+p	2	3	13	16.741
Ga1	1	+p	2	3	14	11.99
Ga1	1	+p	2	3	15	12.191
Ga1	1	+p	2	4	1	12.494
Ga1	1	+p	2	4	2	12.727
Ga1	1	+p	2	4	3	8.816
Ga1	1	+p	2	4	4	18.489
Ga1	1	+p	2	4	5	15.255
Ga1	1	+p	2	4	6	15.601
Ga1	1	+p	2	4	7	8.953
Ga1	1	+p	2	4	8	15.072
Ga1	1	+p	2	4	9	13.709
Ga1	1	+p	2	4	10	11.319
Ga1	1	+p	2	4	11	12.219
Ga1	1	+p	2	4	12	11.196
Ga1	1	+p	2	4	13	11.916
Ga1	1	+p	2	4	14	10.503
Ga1	1	+p	2	4	15	15.652
Ga1	1	+p	2	5	1	10.976
Ga1	1	+p	2	5	2	10.854
Ga1	1	+p	2	5	3	13.709
Ga1	1	+p	2	5	4	10.3
Ga1	1	+p	2	5	5	9.809
Ga1	1	+p	2	5	6	13.389
Ga1	1	+p	2	5	7	13.263
Ga1	1	+p	2	5	8	13.835
Ga1	1	+p	2	5	9	11.958
Ga1	1	+p	2	5	10	16.774
Ga1	1	+p	2	5	11	12.269
Ga1	1	+p	2	5	12	12.545
Ga1	2	-p	1	1	1	12.628
Ga1	2	-p	1	1	2	11.572
Ga1	2	-p	1	1	3	12.836
Ga1	2	-p	1	1	4	16.203
Ga1	2	-p	1	1	5	16.499
Ga1	2	-p	1	1	6	10.83
Ga1	2	-p	1	1	7	11.738
Ga1	2	-p	1	1	8	15.297
Ga1	2	-p	1	1	9	14.009
Ga1	2	-p	1	1	10	10.693
Ga1	2	-p	1	1	11	13.749
Ga1	2	-p	1	1	12	16.317
Ga1	2	-p	1	1	13	13.672
Ga1	2	-p	1	1	14	11.738
Ga1	2	-p	1	1	15	10.729
Ga1	2	-p	1	1	16	8.72
Ga1	2	-p	1	1	17	8.816
Ga1	2	-p	1	2	1	11.109
Ga1	2	-p	1	2	2	9.357
Ga1	2	-p	1	2	3	12.177
Ga1	2	-p	1	2	4	15.349
Ga1	2	-p	1	2	5	15.25
Ga1	2	-p	1	2	6	9.6
Ga1	2	-p	1	2	7	13.928
Ga1	2	-p	1	2	8	12.678
Ga1	2	-p	1	2	9	14.021
Ga1	2	-p	1	2	10	12.744
Ga1	2	-p	1	2	11	11.319
Ga1	2	-p	1	2	12	9.334
Ga1	2	-p	1	2	13	13.871
Ga1	2	-p	1	3	1	11.552
Ga1	2	-p	1	3	2	13.583
Ga1	2	-p	1	3	3	17.927
Ga1	2	-p	1	3	4	13.223
Ga1	2	-p	1	3	5	15.267
Ga1	2	-p	1	3	6	6.536
Ga1	2	-p	1	3	7	7.43
Ga1	2	-p	1	3	8	10.588
Ga1	2	-p	1	3	9	7.197
Ga1	2	-p	1	3	10	16.11
Ga1	2	-p	1	3	11	11.144
Ga1	2	-p	1	4	1	10.038
Ga1	2	-p	1	4	2	10.471
Ga1	2	-p	1	4	3	12.545
Ga1	2	-p	1	4	4	15.907
Ga1	2	-p	1	4	5	13.06
Ga1	2	-p	1	4	6	12.253
Ga1	2	-p	1	4	7	13.346
Ga1	2	-p	1	4	8	12.025
Ga1	2	-p	1	4	9	14.541
Ga1	2	-p	1	4	10	8.079
Ga1	2	-p	1	4	11	8.481
Ga1	2	-p	1	4	12	8.731
Ga1	2	-p	2	1	1	12.678
Ga1	2	-p	2	1	2	9.428
Ga1	2	-p	2	1	3	8.426
Ga1	2	-p	2	1	4	13.124
Ga1	2	-p	2	1	5	12.177
Ga1	2	-p	2	1	6	16.245
Ga1	2	-p	2	1	7	17.88
Ga1	2	-p	2	1	8	14.215
Ga1	2	-p	2	1	9	13.133
Ga1	2	-p	2	1	10	15.186
Ga1	2	-p	2	1	11	15.582
Ga1	2	-p	2	1	12	13.399
Ga1	2	-p	2	1	13	11.916
Ga1	2	-p	2	2	1	10.444
Ga1	2	-p	2	2	2	12.45
Ga1	2	-p	2	2	3	13.749
Ga1	2	-p	2	2	4	15.217
Ga1	2	-p	2	2	5	16.459
Ga1	2	-p	2	2	6	12.088
Ga1	2	-p	2	2	7	14.242
Ga1	2	-p	2	2	8	14.512
Ga1	2	-p	2	2	9	12.927
Ga1	2	-p	2	2	10	13.646
Ga1	2	-p	2	2	11	12.876
Ga1	2	-p	2	2	12	13.08
Ga1	2	-p	2	2	13	14.453
Ga1	2	-p	2	2	14	11.867
Ga1	2	-p	2	2	15	8.868
Ga1	2	-p	2	3	1	13.651
Ga1	2	-p	2	3	2	8.426
Ga1	2	-p	2	3	3	11.745
Ga1	2	-p	2	3	4	10.865
Ga1	2	-p	2	3	5	9.293
Ga1	2	-p	2	3	6	14.06
Ga1	2	-p	2	3	7	16.245
Ga1	2	-p	2	3	8	14.024
Ga1	2	-p	2	3	9	11.601
Ga1	2	-p	2	3	10	12.953
Ga1	2	-p	2	3	11	15.95
Ga1	2	-p	2	4	1	11.972
Ga1	2	-p	2	4	2	19.947
Ga1	2	-p	2	4	3	16.852
Ga1	2	-p	2	4	4	16.42
Ga1	2	-p	2	4	5	14.78
Ga1	2	-p	2	4	6	15.098
Ga1	2	-p	2	4	7	8.411
Ga1	2	-p	2	4	8	7.608
Ga1	2	-p	2	4	9	10.693
Ga1	2	-p	2	4	10	12.94
Ga1	2	-p	2	4	11	13.773
Ga1	2	-p	2	4	12	10.658
Ga1	2	-p	2	4	13	12.205
Ga1	2	+p	1	1	1	11.319
Ga1	2	+p	1	1	2	11.189
Ga1	2	+p	1	1	3	17.719
Ga1	2	+p	1	1	4	13.302
Ga1	2	+p	1	1	5	15.46
Ga1	2	+p	1	1	6	15.751
Ga1	2	+p	1	1	7	15.033
Ga1	2	+p	1	1	8	9.739
Ga1	2	+p	1	1	9	15.305
Ga1	2	+p	1	1	10	10.451
Ga1	2	+p	1	1	11	14.06
Ga1	2	+p	1	2	1	12.783
Ga1	2	+p	1	2	2	13.819
Ga1	2	+p	1	2	3	11.018
Ga1	2	+p	1	2	4	14.565
Ga1	2	+p	1	2	5	11.467
Ga1	2	+p	1	2	6	14.44
Ga1	2	+p	1	2	7	8.525
Ga1	2	+p	1	2	8	8.451
Ga1	2	+p	1	2	9	12.518
Ga1	2	+p	1	2	10	15.942
Ga1	2	+p	1	2	11	13.828
Ga1	2	+p	1	2	12	12.177
Ga1	2	+p	1	3	1	13.394
Ga1	2	+p	1	3	2	11.279
Ga1	2	+p	1	3	3	15.186
Ga1	2	+p	1	3	4	14.84
Ga1	2	+p	1	3	5	10.878
Ga1	2	+p	1	3	6	11.479
Ga1	2	+p	1	3	7	15.945
Ga1	2	+p	1	3	8	16.343
Ga1	2	+p	1	3	9	10.453
Ga1	2	+p	1	3	10	11.827
Ga1	2	+p	1	3	11	15.802
Ga1	2	+p	1	3	12	12.787
Ga1	2	+p	1	3	13	11.413
Ga1	2	+p	1	3	14	7.011
Ga1	2	+p	1	3	15	11.771
Ga1	2	+p	1	4	1	14.588
Ga1	2	+p	1	4	2	10.272
Ga1	2	+p	1	4	3	11.916
Ga1	2	+p	1	4	4	14.771
Ga1	2	+p	1	4	5	14.504
Ga1	2	+p	1	4	6	11.151
Ga1	2	+p	1	4	7	15.536
Ga1	2	+p	1	4	8	14.634
Ga1	2	+p	1	4	9	14.783
Ga1	2	+p	1	4	10	10.475
Ga1	2	+p	1	4	11	12.836
Ga1	2	+p	1	4	12	7.778
Ga1	2	+p	1	4	13	9.018
Ga1	2	+p	1	4	14	13.333
Ga1	2	+p	2	1	1	10.865
Ga1	2	+p	2	1	2	6.963
Ga1	2	+p	2	1	3	12.806
Ga1	2	+p	2	1	4	17.927
Ga1	2	+p	2	1	5	13.856
Ga1	2	+p	2	1	6	8.038
Ga1	2	+p	2	1	7	13.484
Ga1	2	+p	2	1	8	0.02
Ga1	2	+p	2	1	9	11.916
Ga1	2	+p	2	1	10	14.519
Ga1	2	+p	2	1	11	13.66
Ga1	2	+p	2	1	12	10.439
Ga1	2	+p	2	1	13	16.32
Ga1	2	+p	2	1	14	12.734
Ga1	2	+p	2	1	15	12.767
Ga1	2	+p	2	2	1	8.698
Ga1	2	+p	2	2	2	10.403
Ga1	2	+p	2	2	3	10.941
Ga1	2	+p	2	2	4	12.813
Ga1	2	+p	2	2	5	13.703
Ga1	2	+p	2	2	6	12.399
Ga1	2	+p	2	2	7	14.567
Ga1	2	+p	2	2	8	12.76
Ga1	2	+p	2	2	9	13.766
Ga1	2	+p	2	2	10	11.472
Ga1	2	+p	2	2	11	9.792
Ga1	2	+p	2	3	1	9.982
Ga1	2	+p	2	3	2	7.831
Ga1	2	+p	2	3	3	9.28
Ga1	2	+p	2	3	4	10.049
Ga1	2	+p	2	3	5	13.611
Ga1	2	+p	2	3	6	16.593
Ga1	2	+p	2	3	7	10.853
Ga1	2	+p	2	3	8	14.76
Ga1	2	+p	2	3	9	12.174
Ga1	2	+p	2	3	10	8.406
Ga1	2	+p	2	3	11	12.025
Ga1	2	+p	2	3	12	13.384
Ga1	2	+p	2	3	13	13.056
Ga1	2	+p	2	3	14	12.544
Ga1	2	+p	2	3	15	7.558
Ga1	2	+p	2	3	16	12.757
Ga1	2	+p	2	4	1	11.827
Ga1	2	+p	2	4	2	8.559
Ga1	2	+p	2	4	3	9.357
Ga1	2	+p	2	4	4	10.853
Ga1	2	+p	2	4	5	6.822
Ga1	2	+p	2	4	6	13.913
Ga1	2	+p	2	4	7	13.77
Ga1	2	+p	2	4	8	12.177
Ga1	2	+p	2	4	9	9.872
Ga1	2	+p	2	4	10	13.7
Ga1	2	+p	2	4	11	10.439
Ga1	2	+p	2	4	12	10.248
Ga1	2	+p	2	4	13	8.564
Kondara	1	-p	1	1	1	9.13
Kondara	1	-p	1	1	2	10.227
Kondara	1	-p	1	1	3	15.349
Kondara	1	-p	1	1	4	14.356
Kondara	1	-p	1	1	5	14.583
Kondara	1	-p	1	1	6	17.657
Kondara	1	-p	1	1	7	18.667
Kondara	1	-p	1	1	8	13.571
Kondara	1	-p	1	1	9	11.13
Kondara	1	-p	1	2	1	6.438
Kondara	1	-p	1	2	2	6.056
Kondara	1	-p	1	2	3	7.534
Kondara	1	-p	1	2	4	18.149
Kondara	1	-p	1	2	5	21.739
Kondara	1	-p	1	2	6	16.557
Kondara	1	-p	1	2	7	15.267
Kondara	1	-p	1	2	8	15.063
Kondara	1	-p	1	2	9	8.809
Kondara	1	-p	1	2	10	8.913
Kondara	1	-p	1	3	1	10.741
Kondara	1	-p	1	3	2	9.809
Kondara	1	-p	1	3	3	10.106
Kondara	1	-p	1	3	4	11.683
Kondara	1	-p	1	3	5	10.134
Kondara	1	-p	1	3	6	13.263
Kondara	1	-p	1	3	7	10.904
Kondara	1	-p	1	3	8	19.787
Kondara	1	-p	1	3	9	17.359
Kondara	1	-p	1	3	10	7.054
Kondara	1	-p	1	4	1	13.346
Kondara	1	-p	1	4	2	11.11
Kondara	1	-p	1	4	3	15.077
Kondara	1	-p	1	4	4	14.172
Kondara	1	-p	1	4	5	15.959
Kondara	1	-p	1	4	6	19.642
Kondara	1	-p	1	4	7	10.765
Kondara	1	-p	1	4	8	9.597
Kondara	1	-p	1	4	9	14.783
Kondara	1	-p	1	4	10	10.208
Kondara	1	-p	1	4	11	11.725
Kondara	1	-p	1	5	1	14.052
Kondara	1	-p	1	5	2	17.944
Kondara	1	-p	1	5	3	17.621
Kondara	1	-p	1	5	4	15.006
Kondara	1	-p	1	5	5	16.205
Kondara	1	-p	1	5	6	16.506
Kondara	1	-p	1	5	7	11.863
Kondara	1	-p	1	5	8	9.955
Kondara	1	-p	1	5	9	7.612
Kondara	1	-p	1	5	10	9.371
Kondara	1	-p	1	5	11	11.638
Kondara	1	-p	2	1	1	7.496
Kondara	1	-p	2	1	2	14.052
Kondara	1	-p	2	1	3	15.217
Kondara	1	-p	2	1	4	14.591
Kondara	1	-p	2	1	5	19.135
Kondara	1	-p	2	1	6	17.2
Kondara	1	-p	2	1	7	14.097
Kondara	1	-p	2	1	8	12.611
Kondara	1	-p	2	1	9	11.707
Kondara	1	-p	2	2	1	13.818
Kondara	1	-p	2	2	2	14.142
Kondara	1	-p	2	2	3	17.704
Kondara	1	-p	2	2	4	11.511
Kondara	1	-p	2	2	5	12.182
Kondara	1	-p	2	2	6	22.157
Kondara	1	-p	2	2	7	23.105
Kondara	1	-p	2	2	8	18.121
Kondara	1	-p	2	2	9	18.287
Kondara	1	-p	2	2	10	11.085
Kondara	1	-p	2	2	11	15.217
Kondara	1	-p	2	2	12	13.394
Kondara	1	-p	2	3	1	8.548
Kondara	1	-p	2	3	2	13.072
Kondara	1	-p	2	3	3	12.912
Kondara	1	-p	2	3	4	11.001
Kondara	1	-p	2	3	5	10.115
Kondara	1	-p	2	3	6	14.172
Kondara	1	-p	2	3	7	16.739
Kondara	1	-p	2	3	8	12.182
Kondara	1	-p	2	3	9	18.324
Kondara	1	-p	2	3	10	16.403
Kondara	1	-p	2	3	11	9.438
Kondara	1	-p	2	4	1	5.435
Kondara	1	-p	2	4	2	7.609
Kondara	1	-p	2	4	3	12.45
Kondara	1	-p	2	4	4	17.618
Kondara	1	-p	2	4	5	12.798
Kondara	1	-p	2	4	6	17.175
Kondara	1	-p	2	4	7	17.742
Kondara	1	-p	2	4	8	12.581
Kondara	1	-p	2	4	9	8.391
Kondara	1	-p	2	4	10	7.877
Kondara	1	-p	2	5	1	9.042
Kondara	1	-p	2	5	2	12.863
Kondara	1	-p	2	5	3	14.454
Kondara	1	-p	2	5	4	15.478
Kondara	1	-p	2	5	5	19.793
Kondara	1	-p	2	5	6	14.376
Kondara	1	-p	2	5	7	11.001
Kondara	1	-p	2	5	8	15.14
Kondara	1	-p	2	5	9	11.298
Kondara	1	-p	2	5	10	11.524
Kondara	1	+p	1	1	1	14.191
Kondara	1	+p	1	1	2	13.475
Kondara	1	+p	1	1	3	9.226
Kondara	1	+p	1	1	4	14.262
Kondara	1	+p	1	1	5	14.109
Kondara	1	+p	1	1	6	15.459
Kondara	1	+p	1	1	7	16.874
Kondara	1	+p	1	1	8	18.043
Kondara	1	+p	1	1	9	17.843
Kondara	1	+p	1	2	1	12.075
Kondara	1	+p	1	2	2	15.519
Kondara	1	+p	1	2	3	10.453
Kondara	1	+p	1	2	4	15.449
Kondara	1	+p	1	2	5	19.47
Kondara	1	+p	1	2	6	15.017
Kondara	1	+p	1	2	7	15.449
Kondara	1	+p	1	2	8	17.23
Kondara	1	+p	1	2	9	15.619
Kondara	1	+p	1	3	1	13.771
Kondara	1	+p	1	3	2	15.256
Kondara	1	+p	1	3	3	12.833
Kondara	1	+p	1	3	4	15.672
Kondara	1	+p	1	3	5	13.766
Kondara	1	+p	1	3	6	15.51
Kondara	1	+p	1	3	7	11.747
Kondara	1	+p	1	3	8	8.849
Kondara	1	+p	1	3	9	12.846
Kondara	1	+p	1	3	10	16.018
Kondara	1	+p	1	3	11	10.038
Kondara	1	+p	1	3	12	11.739
Kondara	1	+p	1	3	13	12.974
Kondara	1	+p	1	4	1	11.867
Kondara	1	+p	1	4	2	14.615
Kondara	1	+p	1	4	3	14.789
Kondara	1	+p	1	4	4	8.72
Kondara	1	+p	1	4	5	17.61
Kondara	1	+p	1	4	6	14.696
Kondara	1	+p	1	4	7	9.61
Kondara	1	+p	1	4	8	17.076
Kondara	1	+p	1	4	9	12.62
Kondara	1	+p	1	4	10	7.874
Kondara	1	+p	1	5	1	9.13
Kondara	1	+p	1	5	2	8.937
Kondara	1	+p	1	5	3	10.854
Kondara	1	+p	1	5	4	16.794
Kondara	1	+p	1	5	5	17.891
Kondara	1	+p	1	5	6	17.141
Kondara	1	+p	1	5	7	15.905
Kondara	1	+p	1	5	8	9.792
Kondara	1	+p	1	5	9	17.097
Kondara	1	+p	1	5	10	12.006
Kondara	1	+p	1	5	11	9.366
Kondara	1	+p	2	1	1	10.878
Kondara	1	+p	2	1	2	12.566
Kondara	1	+p	2	1	3	14.297
Kondara	1	+p	2	1	4	15.372
Kondara	1	+p	2	1	5	9.771
Kondara	1	+p	2	1	6	13.043
Kondara	1	+p	2	1	7	12.366
Kondara	1	+p	2	1	8	13.703
Kondara	1	+p	2	1	9	14.157
Kondara	1	+p	2	1	10	14.472
Kondara	1	+p	2	1	11	7.226
Kondara	1	+p	2	1	12	11.901
Kondara	1	+p	2	2	1	6.087
Kondara	1	+p	2	2	2	5.652
Kondara	1	+p	2	2	3	9.831
Kondara	1	+p	2	2	4	16.035
Kondara	1	+p	2	2	5	14.021
Kondara	1	+p	2	2	6	20.91
Kondara	1	+p	2	2	7	18.48
Kondara	1	+p	2	2	8	19.74
Kondara	1	+p	2	2	9	11.021
Kondara	1	+p	2	3	1	10.455
Kondara	1	+p	2	3	2	9.348
Kondara	1	+p	2	3	3	12.059
Kondara	1	+p	2	3	4	20.766
Kondara	1	+p	2	3	5	15.881
Kondara	1	+p	2	3	6	19.307
Kondara	1	+p	2	3	7	13.438
Kondara	1	+p	2	3	8	14.823
Kondara	1	+p	2	3	9	9.686
Kondara	1	+p	2	3	10	10.973
Kondara	1	+p	2	3	11	11.601
Kondara	1	+p	2	3	12	12.846
Kondara	1	+p	2	4	1	8.055
Kondara	1	+p	2	4	2	14.624
Kondara	1	+p	2	4	3	16.246
Kondara	1	+p	2	4	4	11.39
Kondara	1	+p	2	4	5	15.754
Kondara	1	+p	2	4	6	8.707
Kondara	1	+p	2	4	7	10.599
Kondara	1	+p	2	4	8	11.757
Kondara	1	+p	2	4	9	11.021
Kondara	1	+p	2	4	10	15.281
Kondara	1	+p	2	5	1	18.398
Kondara	1	+p	2	5	2	16.846
Kondara	1	+p	2	5	3	20.439
Kondara	1	+p	2	5	4	18.045
Kondara	1	+p	2	5	5	13.06
Kondara	1	+p	2	5	6	20.226
Kondara	1	+p	2	5	7	12.528
Kondara	1	+p	2	5	8	9.411
Kondara	1	+p	2	5	9	12.611
Kondara	1	+p	2	5	10	13.263
Kondara	2	-p	1	1	1	9.511
Kondara	2	-p	1	1	2	8.945
Kondara	2	-p	1	1	3	7.346
Kondara	2	-p	1	1	4	11.791
Kondara	2	-p	1	1	5	8.945
Kondara	2	-p	1	1	6	10.196
Kondara	2	-p	1	1	7	12.858
Kondara	2	-p	1	1	8	11.113
Kondara	2	-p	1	1	9	9.296
Kondara	2	-p	1	1	10	8.883
Kondara	2	-p	1	1	11	9.182
Kondara	2	-p	1	1	12	9.241
Kondara	2	-p	1	2	1	9.876
Kondara	2	-p	1	2	2	14.84
Kondara	2	-p	1	2	3	13.385
Kondara	2	-p	1	2	4	12.489
Kondara	2	-p	1	2	5	18.727
Kondara	2	-p	1	2	6	13.066
Kondara	2	-p	1	2	7	19.779
Kondara	2	-p	1	2	8	15.282
Kondara	2	-p	1	3	1	11.993
Kondara	2	-p	1	3	2	12.65
Kondara	2	-p	1	3	3	14.691
Kondara	2	-p	1	3	4	14.13
Kondara	2	-p	1	3	5	16.841
Kondara	2	-p	1	3	6	16.387
Kondara	2	-p	1	3	7	14.416
Kondara	2	-p	1	3	8	10.229
Kondara	2	-p	1	3	9	11.909
Kondara	2	-p	1	4	1	12.642
Kondara	2	-p	1	4	2	13.831
Kondara	2	-p	1	4	3	14.592
Kondara	2	-p	1	4	4	14.814
Kondara	2	-p	1	4	5	16.542
Kondara	2	-p	1	4	6	12.835
Kondara	2	-p	1	4	7	12.809
Kondara	2	-p	1	4	8	13.385
Kondara	2	-p	1	4	9	11.848
Kondara	2	-p	1	4	10	13.095
Kondara	2	-p	2	1	1	15.97
Kondara	2	-p	2	1	2	16.438
Kondara	2	-p	2	1	3	18.003
Kondara	2	-p	2	1	4	16.325
Kondara	2	-p	2	1	5	9.006
Kondara	2	-p	2	1	6	13.647
Kondara	2	-p	2	1	7	15.037
Kondara	2	-p	2	1	8	9.241
Kondara	2	-p	2	1	9	15.238
Kondara	2	-p	2	1	10	11.705
Kondara	2	-p	2	1	11	9.382
Kondara	2	-p	2	2	1	11.614
Kondara	2	-p	2	2	2	9.582
Kondara	2	-p	2	2	3	12.966
Kondara	2	-p	2	2	4	14.046
Kondara	2	-p	2	2	5	12.789
Kondara	2	-p	2	2	6	12.253
Kondara	2	-p	2	2	7	17.171
Kondara	2	-p	2	2	8	14.967
Kondara	2	-p	2	2	9	16.551
Kondara	2	-p	2	2	10	7.538
Kondara	2	-p	2	2	11	7.017
Kondara	2	-p	2	2	12	10.649
Kondara	2	-p	2	3	1	13.284
Kondara	2	-p	2	3	2	15.307
Kondara	2	-p	2	3	3	20.245
Kondara	2	-p	2	3	4	19.48
Kondara	2	-p	2	3	5	13.829
Kondara	2	-p	2	3	6	18.809
Kondara	2	-p	2	3	7	14.328
Kondara	2	-p	2	3	8	14.937
Kondara	2	-p	2	3	9	10.915
Kondara	2	-p	2	3	10	10.774
Kondara	2	-p	2	3	11	11.198
Kondara	2	-p	2	4	1	12.579
Kondara	2	-p	2	4	2	15.202
Kondara	2	-p	2	4	3	19.532
Kondara	2	-p	2	4	4	13.937
Kondara	2	-p	2	4	5	12.949
Kondara	2	-p	2	4	6	15.098
Kondara	2	-p	2	4	7	10.779
Kondara	2	-p	2	4	8	11.095
Kondara	2	-p	2	4	9	15.704
Kondara	2	+p	1	1	1	9.309
Kondara	2	+p	1	1	2	9.332
Kondara	2	+p	1	1	3	13.507
Kondara	2	+p	1	1	4	10.899
Kondara	2	+p	1	1	5	12.855
Kondara	2	+p	1	1	6	13.535
Kondara	2	+p	1	1	7	14.602
Kondara	2	+p	1	1	8	12.489
Kondara	2	+p	1	1	9	12.789
Kondara	2	+p	1	1	10	14.885
Kondara	2	+p	1	1	11	13.551
Kondara	2	+p	1	2	1	13.937
Kondara	2	+p	1	2	2	9.311
Kondara	2	+p	1	2	3	11.193
Kondara	2	+p	1	2	4	14.694
Kondara	2	+p	1	2	5	11.021
Kondara	2	+p	1	2	6	12.732
Kondara	2	+p	1	2	7	14.597
Kondara	2	+p	1	2	8	10.196
Kondara	2	+p	1	2	9	13.781
Kondara	2	+p	1	2	10	14.609
Kondara	2	+p	1	2	11	13.275
Kondara	2	+p	1	2	12	10.346
Kondara	2	+p	1	3	1	11.091
Kondara	2	+p	1	3	2	12.732
Kondara	2	+p	1	3	3	12.474
Kondara	2	+p	1	3	4	13.939
Kondara	2	+p	1	3	5	10.671
Kondara	2	+p	1	3	6	15.051
Kondara	2	+p	1	3	7	13.445
Kondara	2	+p	1	3	8	13.257
Kondara	2	+p	1	3	9	13.79
Kondara	2	+p	1	3	10	12.328
Kondara	2	+p	1	3	11	15.476
Kondara	2	+p	1	3	12	14.166
Kondara	2	+p	1	3	13	13.361
Kondara	2	+p	1	4	1	10.027
Kondara	2	+p	1	4	2	11.995
Kondara	2	+p	1	4	3	13.917
Kondara	2	+p	1	4	4	17.862
Kondara	2	+p	1	4	5	16.017
Kondara	2	+p	1	4	6	12.195
Kondara	2	+p	1	4	7	15.244
Kondara	2	+p	1	4	8	14.182
Kondara	2	+p	1	4	9	15.681
Kondara	2	+p	1	4	10	9.188
Kondara	2	+p	1	4	11	9.802
Kondara	2	+p	2	1	1	10.017
Kondara	2	+p	2	1	2	15.307
Kondara	2	+p	2	1	3	14.478
Kondara	2	+p	2	1	4	16.573
Kondara	2	+p	2	1	5	14.121
Kondara	2	+p	2	1	6	13.939
Kondara	2	+p	2	1	7	13.398
Kondara	2	+p	2	1	8	13.469
Kondara	2	+p	2	1	9	13.342
Kondara	2	+p	2	1	10	9.8
Kondara	2	+p	2	1	11	11.324
Kondara	2	+p	2	1	12	13.113
Kondara	2	+p	2	2	1	12.43
Kondara	2	+p	2	2	2	12.328
Kondara	2	+p	2	2	3	13.355
Kondara	2	+p	2	2	4	13.111
Kondara	2	+p	2	2	5	15.213
Kondara	2	+p	2	2	6	16.187
Kondara	2	+p	2	2	7	14.478
Kondara	2	+p	2	2	8	14.726
Kondara	2	+p	2	2	9	13.469
Kondara	2	+p	2	2	10	14.693
Kondara	2	+p	2	2	11	10.819
Kondara	2	+p	2	2	12	9.591
Kondara	2	+p	2	2	13	9.994
Kondara	2	+p	2	2	14	5.799
Kondara	2	+p	2	3	1	9.582
Kondara	2	+p	2	3	2	13.184
Kondara	2	+p	2	3	3	15.973
Kondara	2	+p	2	3	4	14.142
Kondara	2	+p	2	3	5	14.432
Kondara	2	+p	2	3	6	15.032
Kondara	2	+p	2	3	7	15.686
Kondara	2	+p	2	3	8	17.63
Kondara	2	+p	2	3	9	12.166
Kondara	2	+p	2	3	10	10.473
Kondara	2	+p	2	4	1	13.371
Kondara	2	+p	2	4	2	14.726
Kondara	2	+p	2	4	3	16.334
Kondara	2	+p	2	4	4	12.328
Kondara	2	+p	2	4	5	18.531
Kondara	2	+p	2	4	6	15.258
Kondara	2	+p	2	4	7	14.681
Kondara	2	+p	2	4	8	13.721
Kondara	2	+p	2	4	9	10.325
Kondara	2	+p	2	4	10	10.889
WRKY6	2	-p	1	1	1	8.943
WRKY6	2	-p	1	1	2	10.299
WRKY6	2	-p	1	1	3	14.18
WRKY6	2	-p	1	1	4	20.727
WRKY6	2	-p	1	1	5	10.166
WRKY6	2	-p	1	1	6	15.994
WRKY6	2	-p	1	1	7	14.88
WRKY6	2	-p	1	1	8	14.591
WRKY6	2	-p	1	1	9	10.557
WRKY6	2	-p	1	1	10	9.599
WRKY6	2	-p	1	1	11	12.65
WRKY6	2	-p	1	2	1	10.652
WRKY6	2	-p	1	2	2	16.911
WRKY6	2	-p	1	2	3	24.764
WRKY6	2	-p	1	2	4	23.698
WRKY6	2	-p	1	2	5	13.044
WRKY6	2	-p	1	2	6	10.802
WRKY6	2	-p	1	2	7	12.489
WRKY6	2	-p	1	3	1	14.67
WRKY6	2	-p	1	3	2	11.105
WRKY6	2	-p	1	3	3	19.294
WRKY6	2	-p	1	3	4	9.512
WRKY6	2	-p	1	3	5	14.887
WRKY6	2	-p	1	3	6	15.463
WRKY6	2	-p	1	3	7	19.789
WRKY6	2	-p	1	3	8	12.804
WRKY6	2	-p	1	4	1	10.299
WRKY6	2	-p	1	4	2	13.166
WRKY6	2	-p	1	4	3	12.381
WRKY6	2	-p	1	4	4	14.372
WRKY6	2	-p	1	4	5	20.287
WRKY6	2	-p	1	4	6	20.169
WRKY6	2	-p	2	1	1	14.059
WRKY6	2	-p	2	1	2	16.733
WRKY6	2	-p	2	1	3	14.22
WRKY6	2	-p	2	1	4	14.267
WRKY6	2	-p	2	1	5	14.834
WRKY6	2	-p	2	1	6	22.319
WRKY6	2	-p	2	1	7	18.152
WRKY6	2	-p	2	1	8	12.861
WRKY6	2	-p	2	1	9	13.509
WRKY6	2	-p	2	1	10	8.883
WRKY6	2	-p	2	1	11	11.333
WRKY6	2	-p	2	1	12	12.66
WRKY6	2	-p	2	2	1	11.791
WRKY6	2	-p	2	2	2	11.909
WRKY6	2	-p	2	2	3	9.113
WRKY6	2	-p	2	2	4	15.789
WRKY6	2	-p	2	2	5	14.987
WRKY6	2	-p	2	2	6	15.717
WRKY6	2	-p	2	2	7	14.88
WRKY6	2	-p	2	2	8	16.301
WRKY6	2	-p	2	2	9	19.234
WRKY6	2	-p	2	2	10	17.329
WRKY6	2	-p	2	3	1	16.931
WRKY6	2	-p	2	3	2	24.023
WRKY6	2	-p	2	3	3	16.325
WRKY6	2	-p	2	3	4	10.743
WRKY6	2	-p	2	3	5	8.089
WRKY6	2	-p	2	3	6	10.229
WRKY6	2	-p	2	4	1	14.231
WRKY6	2	-p	2	4	2	16.993
WRKY6	2	-p	2	4	3	18.35
WRKY6	2	-p	2	4	4	12.833
WRKY6	2	-p	2	4	5	13.182
WRKY6	2	-p	2	4	6	16.841
WRKY6	2	-p	2	4	7	11.947
WRKY6	2	-p	2	4	8	13.271
WRKY6	2	+p	1	1	1	10.759
WRKY6	2	+p	1	1	2	16.471
WRKY6	2	+p	1	1	3	14.613
WRKY6	2	+p	1	1	4	18.051
WRKY6	2	+p	1	1	5	18.293
WRKY6	2	+p	1	1	6	22.07
WRKY6	2	+p	1	1	7	14.231
WRKY6	2	+p	1	1	8	13.166
WRKY6	2	+p	1	1	9	9.586
WRKY6	2	+p	1	2	1	14.82
WRKY6	2	+p	1	2	2	6.753
WRKY6	2	+p	1	2	3	13.242
WRKY6	2	+p	1	2	4	15.97
WRKY6	2	+p	1	2	5	8.618
WRKY6	2	+p	1	2	6	17.75
WRKY6	2	+p	1	2	7	17.733
WRKY6	2	+p	1	2	8	13.535
WRKY6	2	+p	1	2	9	14.814
WRKY6	2	+p	1	2	10	17.114
WRKY6	2	+p	1	2	11	11.844
WRKY6	2	+p	1	3	1	11.618
WRKY6	2	+p	1	3	2	9.923
WRKY6	2	+p	1	3	3	15.001
WRKY6	2	+p	1	3	4	18.061
WRKY6	2	+p	1	3	5	9.872
WRKY6	2	+p	1	3	6	18.283
WRKY6	2	+p	1	3	7	13.724
WRKY6	2	+p	1	3	8	13.949
WRKY6	2	+p	1	3	9	14.834
WRKY6	2	+p	1	3	10	7.402
WRKY6	2	+p	1	3	11	10.712
WRKY6	2	+p	1	3	12	12.539
WRKY6	2	+p	1	4	1	15.717
WRKY6	2	+p	1	4	2	14.419
WRKY6	2	+p	1	4	3	15.717
WRKY6	2	+p	1	4	4	15.414
WRKY6	2	+p	1	4	5	16.348
WRKY6	2	+p	1	4	6	12.281
WRKY6	2	+p	1	4	7	15.564
WRKY6	2	+p	1	4	8	14.834
WRKY6	2	+p	1	4	9	11.972
WRKY6	2	+p	2	1	1	12.779
WRKY6	2	+p	2	1	2	15.323
WRKY6	2	+p	2	1	3	15.97
WRKY6	2	+p	2	1	4	19.848
WRKY6	2	+p	2	1	5	16.283
WRKY6	2	+p	2	1	6	13.321
WRKY6	2	+p	2	1	7	9.652
WRKY6	2	+p	2	1	8	14.034
WRKY6	2	+p	2	1	9	11.118
WRKY6	2	+p	2	1	10	6.993
WRKY6	2	+p	2	1	11	12.25
WRKY6	2	+p	2	2	1	9.599
WRKY6	2	+p	2	2	2	12.976
WRKY6	2	+p	2	2	3	9.182
WRKY6	2	+p	2	2	4	14.797
WRKY6	2	+p	2	2	5	13.07
WRKY6	2	+p	2	2	6	18.35
WRKY6	2	+p	2	2	7	13.684
WRKY6	2	+p	2	2	8	13.51
WRKY6	2	+p	2	2	9	14.168
WRKY6	2	+p	2	2	10	14.24
WRKY6	2	+p	2	3	1	15.375
WRKY6	2	+p	2	3	2	18.665
WRKY6	2	+p	2	3	3	18.907
WRKY6	2	+p	2	3	4	12.203
WRKY6	2	+p	2	3	5	10.649
WRKY6	2	+p	2	3	6	9.02
WRKY6	2	+p	2	3	7	7.555
WRKY6	2	+p	2	3	8	16.036
WRKY6	2	+p	2	3	9	11.095
WRKY6	2	+p	2	4	1	13.073
WRKY6	2	+p	2	4	2	13.247
WRKY6	2	+p	2	4	3	14.38
WRKY6	2	+p	2	4	4	11.399
WRKY6	2	+p	2	4	5	14.795
WRKY6	2	+p	2	4	6	10.055
WRKY6	2	+p	2	4	7	13.095
WRKY6	2	+p	2	4	8	8.321
WRKY6	2	+p	2	4	9	8.969
WRKY6	2	+p	2	4	10	15.169

## Sheet: epicellpercortex
name	run	trt	rep	plant	epicellpercortex
Col0_2x	1	-p	1	1	4
Col0_2x	1	-p	1	2	4.333
Col0_2x	1	-p	1	3	4.333
Col0_2x	1	-p	1	4	4
Col0_2x	1	-p	1	5	4.333
Col0_2x	1	-p	2	1	4.333
Col0_2x	1	-p	2	2	3.667
Col0_2x	1	-p	2	3	4
Col0_2x	1	-p	2	4	4
Col0_2x	1	-p	2	5	4
Col0_2x	1	+p	1	1	4
Col0_2x	1	+p	1	2	4.333
Col0_2x	1	+p	1	3	3.667
Col0_2x	1	+p	1	4	3.667
Col0_2x	1	+p	1	5	3.667
Col0_2x	2	-p	1	1	3.667
Col0_2x	2	-p	1	2	5.333
Col0_2x	2	-p	1	3	4.333
Col0_2x	2	-p	1	4	4.667
Col0_2x	2	-p	2	1	3.333
Col0_2x	2	-p	2	2	4
Col0_2x	2	-p	2	3	4.333
Col0_2x	2	-p	2	4	3.667
Col0_2x	2	+p	1	1	5.667
Col0_2x	2	+p	1	2	3.333
Col0_2x	2	+p	1	3	4.333
Col0_2x	2	+p	1	4	4.667
Col0_2x	2	+p	2	1	3.333
Col0_2x	2	+p	2	2	3.333
Col0_2x	2	+p	2	3	5
Col0_2x	2	+p	2	4	5
Col0_4x	2	-p	1	1	3
Col0_4x	2	-p	1	2	4
Col0_4x	2	-p	1	3	4
Col0_4x	2	-p	1	4	4
Col0_4x	2	-p	2	1	4.333
Col0_4x	2	-p	2	2	4.333
Col0_4x	2	-p	2	3	4
Col0_4x	2	-p	2	4	4
Col0_4x	2	+p	1	1	3.667
Col0_4x	2	+p	1	2	5
Col0_4x	2	+p	1	3	3.333
Col0_4x	2	+p	1	4	4
Col0_4x	2	+p	2	1	3.667
Col0_4x	2	+p	2	2	4.667
Col0_4x	2	+p	2	3	4
Col0_4x	2	+p	2	4	3.333
Ga1	1	-p	1	1	4.667
Ga1	1	-p	1	2	4
Ga1	1	-p	1	3	4.333
Ga1	1	-p	1	4	5
Ga1	1	-p	1	5	4.667
Ga1	1	-p	2	1	4
Ga1	1	-p	2	2	4.333
Ga1	1	-p	2	3	4.667
Ga1	1	-p	2	4	5.667
Ga1	1	-p	2	5	5.667
Ga1	1	+p	1	1	5.333
Ga1	1	+p	1	2	5
Ga1	1	+p	1	3	4
Ga1	1	+p	1	4	5
Ga1	1	+p	1	5	4.667
Ga1	1	+p	2	1	5
Ga1	1	+p	2	2	4.667
Ga1	1	+p	2	3	5.667
Ga1	1	+p	2	4	5.667
Ga1	1	+p	2	5	4.667
Ga1	2	-p	1	1	6.333
Ga1	2	-p	1	2	5
Ga1	2	-p	1	3	4.333
Ga1	2	-p	1	4	4.667
Ga1	2	-p	2	1	5
Ga1	2	-p	2	2	5.667
Ga1	2	-p	2	3	4.333
Ga1	2	-p	2	4	5
Ga1	2	+p	1	1	4.333
Ga1	2	+p	1	2	4.667
Ga1	2	+p	1	3	5.667
Ga1	2	+p	1	4	5.333
Ga1	2	+p	2	1	5.667
Ga1	2	+p	2	2	4.333
Ga1	2	+p	2	3	6
Ga1	2	+p	2	4	5
Kondara	1	-p	1	1	3.667
Kondara	1	-p	1	2	4
Kondara	1	-p	1	3	4
Kondara	1	-p	1	4	4.333
Kondara	1	-p	1	5	4.333
Kondara	1	-p	2	1	3.667
Kondara	1	-p	2	2	4.667
Kondara	1	-p	2	3	4.333
Kondara	1	-p	2	4	4
Kondara	1	-p	2	5	4
Kondara	1	+p	1	1	3.667
Kondara	1	+p	1	2	3.667
Kondara	1	+p	1	3	5
Kondara	1	+p	1	4	4
Kondara	1	+p	1	5	4.333
Kondara	1	+p	2	1	4.667
Kondara	1	+p	2	2	3.667
Kondara	1	+p	2	3	4.667
Kondara	1	+p	2	4	4
Kondara	1	+p	2	5	4
Kondara	2	-p	1	1	4.667
Kondara	2	-p	1	2	3.333
Kondara	2	-p	1	3	3.667
Kondara	2	-p	1	4	4
Kondara	2	-p	2	1	4.333
Kondara	2	-p	2	2	4.667
Kondara	2	-p	2	3	4.333
Kondara	2	-p	2	4	3.667
Kondara	2	+p	1	1	4.333
Kondara	2	+p	1	2	4.667
Kondara	2	+p	1	3	5
Kondara	2	+p	1	4	4.333
Kondara	2	+p	2	1	4.667
Kondara	2	+p	2	2	5.333
Kondara	2	+p	2	3	4
Kondara	2	+p	2	4	4
WRKY6	2	-p	1	1	4.333
WRKY6	2	-p	1	2	3
WRKY6	2	-p	1	3	3.333
WRKY6	2	-p	1	4	2.667
WRKY6	2	-p	2	1	4.667
WRKY6	2	-p	2	2	4
WRKY6	2	-p	2	3	2.667
WRKY6	2	-p	2	4	3.333
WRKY6	2	+p	1	1	3.667
WRKY6	2	+p	1	2	4.333
WRKY6	2	+p	1	3	4.667
WRKY6	2	+p	1	4	3.667
WRKY6	2	+p	2	1	4.333
WRKY6	2	+p	2	2	4
WRKY6	2	+p	2	3	3.667
WRKY6	2	+p	2	4	4
