# Supplementary material for: Increased root hair density by loss of WRKY6 in Arabidopsis thaliana
Source: PeerJ. 2017 Jan 24;5:e2891. doi: 10.7717/peerj.2891 (PMC5267569; doi:10.7717/peerj.2891)
Supplement: Supplemental Information 1 [file peerj-05-2891-s003.xlsx]

## Sheet: cont_dens_by_allele
Pos	mean_ref	mean_alt	sd_ref	sd_alt	freq_ref	freq_alt	p
X1_23016777	20.1858	17.3928	7.21367	6.72385	0.828571	0.171429	0.200007
X1_23016845	19.1557	17.6576	7.40246	6.78302	0.857143	0.142857	0.525246
X1_23016865	18.0076	17.2755	6.65939	7.84122	0.185714	0.814286	0.730363
X1_23016911	6.9399	18.3611	2.88599	6.55482	0.957143	0.0428571	0.00390167
X1_23016995	18.2519	13.8153	6.68559	7.78532	0.0857143	0.914286	0.12959
X1_23017100	18.441	17.6276	8.03817	6.33275	0.7	0.3	0.651685
X1_23017200	20.4289	17.1139	7.36655	6.55503	0.771429	0.228571	0.0886493
X1_23017222	17.1139	20.4289	6.55503	7.36655	0.228571	0.771429	0.0886493
X1_23017265	17.1139	20.4289	6.55503	7.36655	0.228571	0.771429	0.0886493
X1_23017570	21.7605	17.4395	6.94264	6.74432	0.9	0.1	0.113378
X1_23017579	16.5386	18.2049	7.05874	6.80657	0.8	0.2	0.418813
X1_23017689	18.3457	10.0501	6.60382	6.65177	0.0571429	0.942857	0.0173554
X1_23017799	18.3457	10.0501	6.60382	6.65177	0.0571429	0.942857	0.0173554
X1_23017949	10.0501	18.3457	6.65177	6.60382	0.942857	0.0571429	0.0173554
X1_23018019	16.7876	17.9373	5.8596	6.92705	0.942857	0.0571429	0.746666
X1_23018105	18.1067	17.6496	6.4444	7.27579	0.514286	0.485714	0.782172
X1_23018290	18.3611	6.9399	6.55482	2.88599	0.0428571	0.957143	0.00390167
X1_23018664	18.8909	17.7932	4.25462	7.01444	0.928571	0.0714286	0.732181
X1_23018665	17.1717	17.8922	7.08825	6.88466	0.971429	0.0285714	0.884512
X1_23018703	19.2587	17.7876	4.75616	6.96246	0.942857	0.0571429	0.679261
X1_23019183	17.4157	17.9756	8.59557	6.46008	0.814286	0.185714	0.792154
X1_23019506	17.9398	17.4625	6.71331	7.92992	0.142857	0.857143	0.839792
X1_23019579	18.0177	17.7078	7.27213	6.42616	0.471429	0.528571	0.851488
X1_23019863	15.6043	18.046	7.62675	6.80831	0.928571	0.0714286	0.445704
X1_23020053	18.3611	6.9399	6.55482	2.88599	0.0428571	0.957143	0.00390167
X1_23020195	18.421	17.1805	7.12412	6.51091	0.442857	0.557143	0.454979
X1_23020252	6.9399	18.3611	2.88599	6.55482	0.957143	0.0428571	0.00390167
X1_23020303	18.3611	6.9399	6.55482	2.88599	0.0428571	0.957143	0.00390167
X1_23020419	17.6748	18.3308	6.86166	6.93062	0.3	0.7	0.715921
X1_23020533	17.8589	18.0821	6.68717	10.3293	0.0571429	0.942857	0.950003
X1_23020682	17.9889	17.3046	6.5628	8.35183	0.171429	0.828571	0.75488
X1_23020767	16.9011	18.3164	6.1671	7.14297	0.685714	0.314286	0.425493
X1_23020773	18.3611	6.9399	6.55482	2.88599	0.0428571	0.957143	0.00390167
X1_23020827	18.6537	17.0435	6.79153	6.89146	0.485714	0.514286	0.328433
X1_23020828	17.9889	17.3046	6.5628	8.35183	0.171429	0.828571	0.75488
X1_23020844	17.7616	17.89	5.46304	7.0809	0.857143	0.142857	0.95664
X1_23020913	17.3046	17.9889	8.35183	6.5628	0.828571	0.171429	0.75488
X1_23020936	17.4002	18.1859	6.7489	6.96121	0.6	0.4	0.641103
X1_23021152	17.7881	18.9576	7.07139	2.25325	0.0714286	0.928571	0.715373
X1_23021165	24.3258	17.4805	5.67981	6.74074	0.942857	0.0571429	0.0511908
X1_23021186	16.6891	18.3784	7.06409	6.74996	0.7	0.3	0.347316
X1_23021188	18.2218	15.9934	6.78385	7.15345	0.157143	0.842857	0.324671
X1_23021210	17.9645	14.7145	6.86569	6.94301	0.0285714	0.971429	0.511684
X1_23021216	14.3031	18.1461	7.5243	6.7684	0.928571	0.0714286	0.228561
X1_23021223	14.505	18.0224	10.1763	6.72435	0.957143	0.0428571	0.387347
X1_23021229	14.5462	18.0205	10.8822	6.69175	0.957143	0.0428571	0.393214
X1_23021238	24.3258	17.4805	5.67981	6.74074	0.942857	0.0571429	0.0511908
X1_23021255	17.4589	17.8838	11.126	6.80519	0.971429	0.0285714	0.931743
X1_23021303	18.0106	15.5784	6.78249	8.45577	0.0571429	0.942857	0.49376
X1_23021329	14.2614	18.0333	10.3891	6.70847	0.957143	0.0428571	0.353737
X1_23021335	14.8767	18.1524	7.48667	6.77043	0.914286	0.0857143	0.264955
X1_23021361	14.3283	18.2653	8.17477	6.63366	0.9	0.1	0.149799
X1_23021366	13.2112	18.1541	5.72449	6.83487	0.942857	0.0571429	0.161992
X1_23021385	17.0694	18.1093	7.06009	6.82107	0.771429	0.228571	0.596841
X1_23021521	17.7512	19.4367	6.86768	6.98566	0.0714286	0.928571	0.599032
X1_23021636	17.4805	24.3258	6.74074	5.67981	0.0571429	0.942857	0.0511908
X1_23021756	19.2409	17.7195	6.00317	6.95161	0.9	0.1	0.580304
X1_23021764	17.7195	19.2409	6.95161	6.00317	0.1	0.9	0.580304
X1_23021765	19.2409	17.7195	6.00317	6.95161	0.9	0.1	0.580304
X1_23021777	13.5347	19.3729	8.01035	5.74008	0.742857	0.257143	0.00134569
X1_23021780	17.7195	19.2409	6.95161	6.00317	0.1	0.9	0.580304
X1_23021822	19.2409	17.7195	6.00317	6.95161	0.9	0.1	0.580304
X1_23021886	17.7195	19.2409	6.95161	6.00317	0.1	0.9	0.580304
X1_23021893	17.7195	19.2409	6.95161	6.00317	0.1	0.9	0.580304
X1_23021953	14.14	19.4709	6.2536	6.49847	0.7	0.3	0.00221859
X1_23022061	17.9625	15.8425	6.90552	5.7775	0.0428571	0.957143	0.603008
X1_23022063	15.8425	17.9625	5.7775	6.90552	0.957143	0.0428571	0.603008
X1_23022065	17.927	17.1516	7.00107	4.66905	0.0714286	0.928571	0.809023
X1_23022124	12.792	19.0301	5.33749	6.64556	0.814286	0.185714	0.0023946
X1_23022195	17.2631	24.3623	6.7271	4.46067	0.0857143	0.914286	0.0139344

## Sheet: def_dens_by_allele
Pos	mean_ref	mean_alt	sd_ref	sd_alt	freq_ref	freq_alt	p
X1_23016777	20.333	20.315	8.58749	7.63314	0.828571	0.171429	0.99419
X1_23016845	18.6001	20.6044	8.30594	7.67669	0.857143	0.142857	0.45233
X1_23016865	20.336	20.2392	7.83643	7.60078	0.185714	0.814286	0.967876
X1_23016911	14.3648	20.5846	6.66765	7.71882	0.957143	0.0428571	0.175012
X1_23016995	20.4862	18.524	7.85646	6.67188	0.0857143	0.914286	0.55644
X1_23017100	19.4785	20.6779	9.2656	7.06241	0.7	0.3	0.556218
X1_23017200	20.4327	20.2841	10.2158	6.95889	0.771429	0.228571	0.946789
X1_23017222	20.2841	20.4327	6.95889	10.2158	0.228571	0.771429	0.946789
X1_23017265	20.2841	20.4327	6.95889	10.2158	0.228571	0.771429	0.946789
X1_23017570	21.1689	20.2235	11.0383	7.40053	0.9	0.1	0.761609
X1_23017579	19.0279	20.6406	7.14519	7.90796	0.8	0.2	0.489545
X1_23017689	20.6194	15.3467	7.7727	5.78752	0.0571429	0.942857	0.187794
X1_23017799	20.6194	15.3467	7.7727	5.78752	0.0571429	0.942857	0.187794
X1_23017949	15.3467	20.6194	5.78752	7.7727	0.942857	0.0571429	0.187794
X1_23018019	23.2179	20.1423	10.9642	7.58133	0.942857	0.0571429	0.444243
X1_23018105	20.0546	20.5669	8.23316	7.35003	0.514286	0.485714	0.784155
X1_23018290	20.5846	14.3648	7.71882	6.66765	0.0428571	0.957143	0.175012
X1_23018664	20.771	20.2832	6.5488	7.86571	0.928571	0.0714286	0.893138
X1_23018665	16.7988	20.4216	7.47426	7.77571	0.971429	0.0285714	0.518026
X1_23018703	20.8388	20.2865	6.37935	7.85352	0.942857	0.0571429	0.890967
X1_23019183	18.8911	20.6435	7.68416	7.78188	0.814286	0.185714	0.465297
X1_23019506	20.3737	19.9845	7.92541	6.87249	0.142857	0.857143	0.884222
X1_23019579	20.3276	20.3073	7.81681	7.77134	0.471429	0.528571	0.991358
X1_23019863	13.9762	20.8059	5.8589	7.68361	0.928571	0.0714286	0.0566159
X1_23020053	20.5846	14.3648	7.71882	6.66765	0.0428571	0.957143	0.175012
X1_23020195	19.7051	21.0893	8.46977	6.76559	0.442857	0.557143	0.461297
X1_23020252	14.3648	20.5846	6.66765	7.71882	0.957143	0.0428571	0.175012
X1_23020303	20.5846	14.3648	7.71882	6.66765	0.0428571	0.957143	0.175012
X1_23020419	21.4626	17.6474	6.85314	9.12133	0.3	0.7	0.0581556
X1_23020533	20.1639	22.8614	7.73829	8.41781	0.0571429	0.942857	0.502442
X1_23020682	20.4169	19.8401	7.46916	9.28855	0.171429	0.828571	0.816144
X1_23020767	17.8047	21.47	7.42441	7.67986	0.685714	0.314286	0.0654068
X1_23020773	20.5846	14.3648	7.71882	6.66765	0.0428571	0.957143	0.175012
X1_23020827	22.0133	18.5231	7.13245	8.05055	0.485714	0.514286	0.0587449
X1_23020828	20.4169	19.8401	7.46916	9.28855	0.171429	0.828571	0.816144
X1_23020844	21.5006	20.121	4.9475	8.12579	0.857143	0.142857	0.60534
X1_23020913	19.8401	20.4169	9.28855	7.46916	0.828571	0.171429	0.816144
X1_23020936	19.3977	20.9316	7.32074	8.03309	0.6	0.4	0.420541
X1_23021152	20.2692	20.9536	8.01003	2.44175	0.0714286	0.928571	0.850466
X1_23021165	25.8893	19.9804	2.41217	7.82812	0.942857	0.0571429	0.139264
X1_23021186	17.0435	21.7214	9.15846	6.66625	0.7	0.3	0.019337
X1_23021188	21.5041	13.9567	7.18621	7.80355	0.157143	0.842857	0.00237936
X1_23021210	20.5887	11.1158	7.6749	3.37389	0.0285714	0.971429	0.08804
X1_23021216	20.6274	20.2943	11.1228	7.53836	0.928571	0.0714286	0.926909
X1_23021223	16.2976	20.4981	13.9767	7.47819	0.957143	0.0428571	0.361487
X1_23021229	17.6682	20.4367	8.99857	7.73455	0.957143	0.0428571	0.548247
X1_23021238	25.8893	19.9804	2.41217	7.82812	0.942857	0.0571429	0.139264
X1_23021255	14.989	20.4748	2.1484	7.79323	0.971429	0.0285714	0.326699
X1_23021303	20.2605	21.2684	7.79265	7.77429	0.0571429	0.942857	0.802416
X1_23021329	19.1901	20.3686	11.5646	7.64836	0.957143	0.0428571	0.798493
X1_23021335	15.2233	20.7957	9.99491	7.41349	0.914286	0.0857143	0.0918544
X1_23021361	16.8456	20.7039	6.53197	7.81078	0.9	0.1	0.21318
X1_23021366	14.698	20.6587	3.5351	7.80612	0.942857	0.0571429	0.135772
X1_23021385	16.098	21.5685	9.48756	6.74707	0.771429	0.228571	0.0119312
X1_23021521	20.2803	20.8088	7.44893	12.0401	0.0714286	0.928571	0.884278
X1_23021636	19.9804	25.8893	7.82812	2.41217	0.0571429	0.942857	0.139264
X1_23021756	20.3103	20.3189	10.6275	7.46458	0.9	0.1	0.997785
X1_23021764	20.3189	20.3103	7.46458	10.6275	0.1	0.9	0.997785
X1_23021765	20.3103	20.3189	10.6275	7.46458	0.9	0.1	0.997785
X1_23021777	16.2357	21.7312	7.05538	7.51762	0.742857	0.257143	0.00841988
X1_23021780	20.3189	20.3103	7.46458	10.6275	0.1	0.9	0.997785
X1_23021822	20.3103	20.3189	10.6275	7.46458	0.9	0.1	0.997785
X1_23021886	20.3189	20.3103	7.46458	10.6275	0.1	0.9	0.997785
X1_23021893	20.3189	20.3103	7.46458	10.6275	0.1	0.9	0.997785
X1_23021953	17.0241	21.7298	7.98399	7.26279	0.7	0.3	0.0186014
X1_23022061	20.2397	22.0679	7.84868	5.33783	0.0428571	0.957143	0.691972
X1_23022063	22.0679	20.2397	5.33783	7.84868	0.957143	0.0428571	0.691972
X1_23022065	20.2281	21.488	7.96996	3.86095	0.0714286	0.928571	0.728495
X1_23022124	17.1363	21.0437	6.10602	7.93194	0.814286	0.185714	0.100779
X1_23022195	19.8782	25.0102	7.92932	2.31261	0.0857143	0.914286	0.121146

## Sheet: rel_dens_by_allele
Pos	mean_ref	mean_alt	sd_ref	sd_alt	freq_ref	freq_alt	p
X1_23016777	1.30543	1.25488	1.18007	0.550261	0.828571	0.171429	0.818535
X1_23016845	1.33283	1.252	1.29865	0.542559	0.857143	0.142857	0.733333
X1_23016865	1.25718	1.29146	0.733097	0.45587	0.185714	0.814286	0.872497
X1_23016911	2.3841	1.21337	1.72455	0.586704	0.957143	0.0428571	0.00320912
X1_23016995	1.21905	1.73811	0.599399	1.30306	0.0857143	0.914286	0.0767863
X1_23017100	1.33915	1.23114	1.15912	0.340334	0.7	0.3	0.550759
X1_23017200	1.18647	1.28638	1.06633	0.539451	0.771429	0.228571	0.613192
X1_23017222	1.28638	1.18647	0.539451	1.06633	0.228571	0.771429	0.613192
X1_23017265	1.28638	1.18647	0.539451	1.06633	0.228571	0.771429	0.613192
X1_23017570	0.899411	1.304	0.443106	0.70015	0.9	0.1	0.140748
X1_23017579	1.42634	1.22285	1.04088	0.572935	0.8	0.2	0.325403
X1_23017689	1.21745	2.02404	0.59024	1.58155	0.0571429	0.942857	0.0215506
X1_23017799	1.21745	2.02404	0.59024	1.58155	0.0571429	0.942857	0.0215506
X1_23017949	2.02404	1.21745	1.58155	0.59024	0.942857	0.0571429	0.0215506
X1_23018019	1.40171	1.25517	0.447465	0.700777	0.942857	0.0571429	0.681989
X1_23018105	1.14648	1.37411	0.423895	0.858015	0.514286	0.485714	0.167793
X1_23018290	1.21337	2.3841	0.586704	1.72455	0.0428571	0.957143	0.00320912
X1_23018664	1.09115	1.27681	0.2078	0.71008	0.928571	0.0714286	0.56439
X1_23018665	0.971187	1.27214	0.034373	0.695671	0.971429	0.0285714	0.545558
X1_23018703	1.06872	1.27535	0.121233	0.705988	0.942857	0.0571429	0.56317
X1_23019183	1.40928	1.23031	1.09511	0.564929	0.814286	0.185714	0.400876
X1_23019506	1.27203	1.21264	0.734113	0.293596	0.142857	0.857143	0.802384
X1_23019579	1.22666	1.3049	0.63247	0.751976	0.471429	0.528571	0.637952
X1_23019863	0.943664	1.28815	0.29589	0.703798	0.928571	0.0714286	0.283439
X1_23020053	1.21337	2.3841	0.586704	1.72455	0.0428571	0.957143	0.00320912
X1_23020195	1.11703	1.44787	0.414937	0.897578	0.442857	0.557143	0.0446349
X1_23020252	2.3841	1.21337	1.72455	0.586704	0.957143	0.0428571	0.00320912
X1_23020303	1.21337	2.3841	0.586704	1.72455	0.0428571	0.957143	0.00320912
X1_23020419	1.38862	0.971701	0.747359	0.402307	0.3	0.7	0.0189134
X1_23020533	1.24722	1.53284	0.691808	0.628706	0.0571429	0.942857	0.423698
X1_23020682	1.24635	1.34664	0.603288	1.03383	0.171429	0.828571	0.648827
X1_23020767	1.13017	1.32468	0.444384	0.770253	0.685714	0.314286	0.274891
X1_23020773	1.21337	2.3841	0.586704	1.72455	0.0428571	0.957143	0.00320912
X1_23020827	1.31735	1.20657	0.678656	0.702112	0.485714	0.514286	0.504344
X1_23020828	1.24635	1.34664	0.603288	1.03383	0.171429	0.828571	0.648827
X1_23020844	1.31933	1.25425	0.431799	0.723551	0.857143	0.142857	0.783899
X1_23020913	1.34664	1.24635	1.03383	0.603288	0.828571	0.171429	0.648827
X1_23020936	1.24933	1.27302	0.735697	0.662207	0.6	0.4	0.888839
X1_23021152	1.27444	1.12186	0.710465	0.217749	0.0714286	0.928571	0.63587
X1_23021165	1.09473	1.27378	0.196532	0.705643	0.942857	0.0571429	0.616514
X1_23021186	1.05256	1.35397	0.453651	0.752093	0.7	0.3	0.092902
X1_23021188	1.3228	0.94571	0.713974	0.414486	0.157143	0.842857	0.095065
X1_23021210	1.2775	0.789186	0.692375	0.143086	0.0285714	0.971429	0.325664
X1_23021216	1.5917	1.2383	0.575011	0.692595	0.928571	0.0714286	0.271067
X1_23021223	1.05425	1.27292	0.289743	0.699537	0.957143	0.0428571	0.59352
X1_23021229	1.36727	1.2589	0.442456	0.698235	0.957143	0.0428571	0.791545
X1_23021238	1.09473	1.27378	0.196532	0.705643	0.942857	0.0571429	0.616514
X1_23021255	1.02808	1.27047	0.532108	0.693306	0.971429	0.0285714	0.626554
X1_23021303	1.2438	1.58933	0.692364	0.575391	0.0571429	0.942857	0.332591
X1_23021329	1.43632	1.25581	0.372206	0.698828	0.957143	0.0428571	0.65961
X1_23021335	1.16516	1.27277	0.60825	0.697945	0.914286	0.0857143	0.716723
X1_23021361	1.37286	1.2514	0.542435	0.704181	0.9	0.1	0.660669
X1_23021366	1.22994	1.26558	0.453754	0.701426	0.942857	0.0571429	0.92067
X1_23021385	0.961756	1.35296	0.456866	0.721405	0.771429	0.228571	0.0447218
X1_23021521	1.28404	0.997057	0.693904	0.592419	0.0714286	0.928571	0.372169
X1_23021636	1.27378	1.09473	0.705643	0.196532	0.0571429	0.942857	0.616514
X1_23021756	0.99307	1.2936	0.496982	0.701972	0.9	0.1	0.275633
X1_23021764	1.2936	0.99307	0.701972	0.496982	0.1	0.9	0.275633
X1_23021765	0.99307	1.2936	0.496982	0.701972	0.9	0.1	0.275633
X1_23021777	1.61031	1.14351	1.17844	0.345287	0.742857	0.257143	0.0119409
X1_23021780	1.2936	0.99307	0.701972	0.496982	0.1	0.9	0.275633
X1_23021822	0.99307	1.2936	0.496982	0.701972	0.9	0.1	0.275633
X1_23021886	1.2936	0.99307	0.701972	0.496982	0.1	0.9	0.275633
X1_23021893	1.2936	0.99307	0.701972	0.496982	0.1	0.9	0.275633
X1_23021953	1.35278	1.2253	0.830857	0.621776	0.7	0.3	0.481075
X1_23022061	1.25477	1.45951	0.699687	0.292391	0.0428571	0.957143	0.617309
X1_23022063	1.45951	1.25477	0.292391	0.699687	0.957143	0.0428571	0.617309
X1_23022065	1.25988	1.31115	0.709697	0.29804	0.0714286	0.928571	0.873697
X1_23022124	1.52643	1.20359	0.906882	0.621489	0.814286	0.185714	0.1274
X1_23022195	1.28378	1.04768	0.714372	0.170872	0.0857143	0.914286	0.425113

## Sheet: con_length_by_allele
Pos	mean_ref	mean_alt	sd_ref	sd_alt	freq_ref	freq_alt	p
X1_23016777	0.25884	0.229172	0.088431	0.0859586	0.828571	0.171429	0.282541
X1_23016845	0.251418	0.231398	0.0949709	0.0855023	0.857143	0.142857	0.501873
X1_23016865	0.231758	0.245218	0.0853988	0.0938152	0.185714	0.814286	0.616097
X1_23016911	0.12507	0.239147	0.0502188	0.0847033	0.957143	0.0428571	0.0242701
X1_23016995	0.239577	0.177518	0.0866083	0.0667055	0.0857143	0.914286	0.092957
X1_23017100	0.239271	0.23211	0.101903	0.0800393	0.7	0.3	0.753388
X1_23017200	0.268549	0.224098	0.102771	0.0792799	0.771429	0.228571	0.0706115
X1_23017222	0.224098	0.268549	0.0792799	0.102771	0.228571	0.771429	0.0706115
X1_23017265	0.224098	0.268549	0.0792799	0.102771	0.228571	0.771429	0.0706115
X1_23017570	0.2832	0.22882	0.103128	0.0836174	0.9	0.1	0.115111
X1_23017579	0.228556	0.235684	0.0928611	0.085628	0.8	0.2	0.784909
X1_23017689	0.239605	0.146028	0.0852687	0.0586357	0.0571429	0.942857	0.0345855
X1_23017799	0.239605	0.146028	0.0852687	0.0586357	0.0571429	0.942857	0.0345855
X1_23017949	0.146028	0.239605	0.0586357	0.0852687	0.942857	0.0571429	0.0345855
X1_23018019	0.2638	0.232468	0.0910582	0.0865902	0.942857	0.0571429	0.485647
X1_23018105	0.231777	0.236601	0.0850419	0.0889416	0.514286	0.485714	0.817507
X1_23018290	0.239147	0.12507	0.0847033	0.0502188	0.0428571	0.957143	0.0242701
X1_23018664	0.22752	0.234776	0.0800732	0.0875042	0.928571	0.0714286	0.858046
X1_23018665	0.2286	0.234424	0.0362039	0.0876358	0.971429	0.0285714	0.926012
X1_23018703	0.23455	0.23424	0.0222557	0.0889643	0.942857	0.0571429	0.994511
X1_23019183	0.240732	0.232781	0.103566	0.0830831	0.814286	0.185714	0.767238
X1_23019506	0.235699	0.225614	0.0847497	0.100719	0.142857	0.857143	0.735472
X1_23019579	0.247118	0.21984	0.0910932	0.0798891	0.471429	0.528571	0.189716
X1_23019863	0.199392	0.23694	0.110887	0.0847984	0.928571	0.0714286	0.353211
X1_23020053	0.239147	0.12507	0.0847033	0.0502188	0.0428571	0.957143	0.0242701
X1_23020195	0.239194	0.228048	0.0954815	0.0746899	0.442857	0.557143	0.595841
X1_23020252	0.12507	0.239147	0.0502188	0.0847033	0.957143	0.0428571	0.0242701
X1_23020303	0.239147	0.12507	0.0847033	0.0502188	0.0428571	0.957143	0.0242701
X1_23020419	0.233446	0.236154	0.0825725	0.097097	0.3	0.7	0.905451
X1_23020533	0.233477	0.24715	0.0866442	0.0953318	0.0571429	0.942857	0.761255
X1_23020682	0.23417	0.234684	0.0828182	0.106592	0.171429	0.828571	0.985199
X1_23020767	0.218015	0.241703	0.0851738	0.0869247	0.685714	0.314286	0.290639
X1_23020773	0.239147	0.12507	0.0847033	0.0502188	0.0428571	0.957143	0.0242701
X1_23020827	0.244042	0.223898	0.0809512	0.0920285	0.485714	0.514286	0.33363
X1_23020828	0.23417	0.234684	0.0828182	0.106592	0.171429	0.828571	0.985199
X1_23020844	0.22427	0.235923	0.0745575	0.0887527	0.857143	0.142857	0.69621
X1_23020913	0.234684	0.23417	0.106592	0.0828182	0.828571	0.171429	0.985199
X1_23020936	0.232936	0.235139	0.0886872	0.0860361	0.6	0.4	0.917727
X1_23021152	0.236304	0.20766	0.0883017	0.0572482	0.0714286	0.928571	0.479394
X1_23021165	0.285325	0.231163	0.0879356	0.0860838	0.942857	0.0571429	0.226415
X1_23021186	0.220425	0.240186	0.0884152	0.08586	0.7	0.3	0.384821
X1_23021188	0.23956	0.205821	0.0840996	0.0975527	0.157143	0.842857	0.237542
X1_23021210	0.234121	0.2389	0.0867028	0.110592	0.0285714	0.971429	0.93927
X1_23021216	0.2393	0.23387	0.0960206	0.0865052	0.928571	0.0714286	0.893533
X1_23021223	0.166133	0.237308	0.161033	0.0825291	0.957143	0.0428571	0.164702
X1_23021229	0.194547	0.236036	0.0953401	0.0864113	0.957143	0.0428571	0.420183
X1_23021238	0.285325	0.231163	0.0879356	0.0860838	0.942857	0.0571429	0.226415
X1_23021255	0.24	0.234089	0.152876	0.0857364	0.971429	0.0285714	0.924917
X1_23021303	0.234815	0.225075	0.0865062	0.0985987	0.0571429	0.942857	0.828688
X1_23021329	0.221847	0.234814	0.132152	0.0853271	0.957143	0.0428571	0.801511
X1_23021335	0.229645	0.23469	0.0817953	0.0875002	0.914286	0.0857143	0.892471
X1_23021361	0.211063	0.236835	0.0758423	0.0877351	0.9	0.1	0.458435
X1_23021366	0.205235	0.236017	0.0796598	0.0871187	0.942857	0.0571429	0.493371
X1_23021385	0.222489	0.237745	0.0922274	0.0852828	0.771429	0.228571	0.539276
X1_23021521	0.232342	0.25916	0.0874961	0.0752384	0.0714286	0.928571	0.507954
X1_23021636	0.231163	0.285325	0.0860838	0.0879356	0.0571429	0.942857	0.226415
X1_23021756	0.244757	0.233091	0.0661953	0.0887903	0.9	0.1	0.737581
X1_23021764	0.233091	0.244757	0.0887903	0.0661953	0.1	0.9	0.737581
X1_23021765	0.244757	0.233091	0.0661953	0.0887903	0.9	0.1	0.737581
X1_23021777	0.201735	0.245516	0.100041	0.0792326	0.742857	0.257143	0.0636544
X1_23021780	0.233091	0.244757	0.0887903	0.0661953	0.1	0.9	0.737581
X1_23021822	0.244757	0.233091	0.0661953	0.0887903	0.9	0.1	0.737581
X1_23021886	0.233091	0.244757	0.0887903	0.0661953	0.1	0.9	0.737581
X1_23021893	0.233091	0.244757	0.0887903	0.0661953	0.1	0.9	0.737581
X1_23021953	0.220317	0.240233	0.10105	0.0798288	0.7	0.3	0.38108
X1_23022061	0.233219	0.257467	0.0879716	0.0416889	0.0428571	0.957143	0.638092
X1_23022063	0.257467	0.233219	0.0416889	0.0879716	0.957143	0.0428571	0.638092
X1_23022065	0.232349	0.25908	0.0882424	0.0597297	0.0714286	0.928571	0.509322
X1_23022124	0.182512	0.24606	0.0702208	0.0859836	0.814286	0.185714	0.0156776
X1_23022195	0.22922	0.288	0.0867121	0.0682467	0.0857143	0.914286	0.111945

## Sheet: def_length_by_allele
Pos	mean_ref	mean_alt	sd_ref	sd_alt	freq_ref	freq_alt	p
X1_23016777	0.228134	0.228134	0.116496	0.0924617	0.828571	0.171429	0.99999
X1_23016845	0.208961	0.231329	0.0953394	0.0965938	0.857143	0.142857	0.49936
X1_23016865	0.232331	0.209731	0.0980875	0.0877471	0.185714	0.814286	0.44797
X1_23016911	0.10654	0.233578	0.0183845	0.0945139	0.957143	0.0428571	0.0238959
X1_23016995	0.233663	0.169153	0.0961406	0.0793063	0.0857143	0.914286	0.116389
X1_23017100	0.217078	0.232872	0.115502	0.0873338	0.7	0.3	0.532306
X1_23017200	0.244901	0.223166	0.124912	0.0865165	0.771429	0.228571	0.430629
X1_23017222	0.223166	0.244901	0.0865165	0.124912	0.228571	0.771429	0.430629
X1_23017265	0.223166	0.244901	0.0865165	0.124912	0.228571	0.771429	0.430629
X1_23017570	0.293343	0.220888	0.137759	0.0888682	0.9	0.1	0.0577294
X1_23017579	0.216395	0.231069	0.0842257	0.0992658	0.8	0.2	0.612746
X1_23017689	0.234523	0.122705	0.0949185	0.0356448	0.0571429	0.942857	0.0226471
X1_23017799	0.234523	0.122705	0.0949185	0.0356448	0.0571429	0.942857	0.0226471
X1_23017949	0.122705	0.234523	0.0356448	0.0949185	0.942857	0.0571429	0.0226471
X1_23018019	0.3215	0.222475	0.129089	0.0919542	0.942857	0.0571429	0.0444296
X1_23018105	0.225327	0.230784	0.098263	0.0952337	0.514286	0.485714	0.814186
X1_23018290	0.233578	0.10654	0.0945139	0.0183845	0.0428571	0.957143	0.0238959
X1_23018664	0.25912	0.22575	0.0686452	0.0978334	0.928571	0.0714286	0.458133
X1_23018665	0.2161	0.228488	0.00933381	0.0974451	0.971429	0.0285714	0.85886
X1_23018703	0.239075	0.227471	0.0362626	0.0986161	0.942857	0.0571429	0.816456
X1_23019183	0.207802	0.232771	0.0800983	0.0993728	0.814286	0.185714	0.401611
X1_23019506	0.231306	0.209101	0.0975846	0.0885173	0.142857	0.857143	0.502508
X1_23019579	0.229922	0.226128	0.097657	0.0956896	0.471429	0.528571	0.870375
X1_23019863	0.20845	0.229648	0.107678	0.0958614	0.928571	0.0714286	0.637832
X1_23020053	0.233578	0.10654	0.0945139	0.0183845	0.0428571	0.957143	0.0238959
X1_23020195	0.225032	0.232037	0.102851	0.0882734	0.442857	0.557143	0.764262
X1_23020252	0.10654	0.233578	0.0183845	0.0945139	0.957143	0.0428571	0.0238959
X1_23020303	0.233578	0.10654	0.0945139	0.0183845	0.0428571	0.957143	0.0238959
X1_23020419	0.233342	0.215982	0.0863909	0.117029	0.3	0.7	0.492344
X1_23020533	0.228565	0.221025	0.0971256	0.0879447	0.0571429	0.942857	0.880141
X1_23020682	0.226991	0.23366	0.0882033	0.132355	0.171429	0.828571	0.828522
X1_23020767	0.201574	0.240307	0.0864196	0.0986201	0.685714	0.314286	0.117998
X1_23020773	0.233578	0.10654	0.0945139	0.0183845	0.0428571	0.957143	0.0238959
X1_23020827	0.242523	0.212898	0.086803	0.104087	0.485714	0.514286	0.19934
X1_23020828	0.226991	0.23366	0.0882033	0.132355	0.171429	0.828571	0.828522
X1_23020844	0.22914	0.227966	0.0631692	0.100899	0.857143	0.142857	0.97177
X1_23020913	0.23366	0.226991	0.132355	0.0882033	0.828571	0.171429	0.828522
X1_23020936	0.227365	0.228646	0.100363	0.0943004	0.6	0.4	0.956867
X1_23021152	0.228633	0.22164	0.0994064	0.0313673	0.0714286	0.928571	0.876676
X1_23021165	0.2415	0.227324	0.0773844	0.0974966	0.942857	0.0571429	0.776734
X1_23021186	0.208263	0.23665	0.110087	0.0892514	0.7	0.3	0.260166
X1_23021188	0.239674	0.166238	0.0928267	0.0931738	0.157143	0.842857	0.0187809
X1_23021210	0.230473	0.1486	0.0964222	0.0254558	0.0285714	0.971429	0.237512
X1_23021216	0.27888	0.22423	0.146903	0.0915491	0.928571	0.0714286	0.222743
X1_23021223	0.138783	0.232135	0.0954366	0.0948162	0.957143	0.0428571	0.0999095
X1_23021229	0.1818	0.230209	0.0831118	0.0966125	0.957143	0.0428571	0.397027
X1_23021238	0.2415	0.227324	0.0773844	0.0974966	0.942857	0.0571429	0.776734
X1_23021255	0.2693	0.226923	0.141421	0.0956594	0.971429	0.0285714	0.54247
X1_23021303	0.228968	0.214375	0.0972137	0.084657	0.0571429	0.942857	0.770352
X1_23021329	0.1768	0.230432	0.0759248	0.0966717	0.957143	0.0428571	0.347778
X1_23021335	0.163162	0.234225	0.0832302	0.0954727	0.914286	0.0857143	0.0830875
X1_23021361	0.191229	0.232234	0.0675021	0.0982635	0.9	0.1	0.28719
X1_23021366	0.164975	0.231962	0.0502481	0.09704	0.942857	0.0571429	0.177456
X1_23021385	0.206526	0.234536	0.119144	0.0883788	0.771429	0.228571	0.309052
X1_23021521	0.222978	0.29516	0.0921458	0.131322	0.0714286	0.928571	0.105847
X1_23021636	0.227324	0.2415	0.0974966	0.0773844	0.0571429	0.942857	0.776734
X1_23021756	0.269114	0.22358	0.116249	0.0935364	0.9	0.1	0.236811
X1_23021764	0.22358	0.269114	0.0935364	0.116249	0.1	0.9	0.236811
X1_23021765	0.269114	0.22358	0.116249	0.0935364	0.9	0.1	0.236811
X1_23021777	0.177169	0.245775	0.0841868	0.0942633	0.742857	0.257143	0.00802706
X1_23021780	0.22358	0.269114	0.0935364	0.116249	0.1	0.9	0.236811
X1_23021822	0.269114	0.22358	0.116249	0.0935364	0.9	0.1	0.236811
X1_23021886	0.22358	0.269114	0.0935364	0.116249	0.1	0.9	0.236811
X1_23021893	0.22358	0.269114	0.0935364	0.116249	0.1	0.9	0.236811
X1_23021953	0.208773	0.236431	0.113369	0.0875939	0.7	0.3	0.272702
X1_23022061	0.227403	0.244467	0.0977612	0.0498572	0.0428571	0.957143	0.765814
X1_23022063	0.244467	0.227403	0.0498572	0.0977612	0.957143	0.0428571	0.765814
X1_23022065	0.22675	0.24612	0.0983888	0.0618516	0.0714286	0.928571	0.667142
X1_23022124	0.168679	0.241694	0.0716033	0.0962353	0.814286	0.185714	0.0123045
X1_23022195	0.226159	0.2492	0.0987919	0.0613262	0.0857143	0.914286	0.577973

## Sheet: rel_length_by_allele
Pos	mean_ref	mean_alt	sd_ref	sd_alt	freq_ref	freq_alt	p
X1_23016777	0.995213	1.02386	0.575336	0.282003	0.828571	0.171429	0.795256
X1_23016845	0.982991	1.02494	0.605136	0.287345	0.857143	0.142857	0.724159
X1_23016865	1.05305	0.869407	0.366326	0.160814	0.185714	0.814286	0.0826751
X1_23016911	0.938394	1.02255	0.394732	0.344882	0.957143	0.0428571	0.681903
X1_23016995	1.02355	0.969791	0.350947	0.285334	0.0857143	0.914286	0.717458
X1_23017100	0.98375	1.03403	0.456915	0.287578	0.7	0.3	0.579351
X1_23017200	0.996951	1.02546	0.502039	0.287854	0.771429	0.228571	0.773498
X1_23017222	1.02546	0.996951	0.287854	0.502039	0.228571	0.771429	0.773498
X1_23017265	1.02546	0.996951	0.287854	0.502039	0.228571	0.771429	0.773498
X1_23017570	1.02247	1.01855	0.261705	0.354037	0.9	0.1	0.977463
X1_23017579	1.05387	1.01021	0.466759	0.311264	0.8	0.2	0.674531
X1_23017689	1.02563	0.908678	0.346598	0.327731	0.0571429	0.942857	0.513511
X1_23017799	1.02563	0.908678	0.346598	0.327731	0.0571429	0.942857	0.513511
X1_23017949	0.908678	1.02563	0.327731	0.346598	0.942857	0.0571429	0.513511
X1_23018019	1.21152	1.00728	0.126305	0.35032	0.942857	0.0571429	0.252283
X1_23018105	1.00022	1.03663	0.323491	0.366674	0.514286	0.485714	0.661664
X1_23018290	1.02255	0.938394	0.344882	0.394732	0.0428571	0.957143	0.681903
X1_23018664	1.2596	1.00044	0.594228	0.317657	0.928571	0.0714286	0.105331
X1_23018665	0.954051	1.02086	0.110265	0.349016	0.971429	0.0285714	0.789066
X1_23018703	1.02303	1.0187	0.154088	0.353248	0.942857	0.0571429	0.980708
X1_23019183	0.999918	1.02329	0.499168	0.304328	0.814286	0.185714	0.827102
X1_23019506	1.0299	0.953247	0.363925	0.187927	0.142857	0.857143	0.518576
X1_23019579	0.943121	1.10396	0.212081	0.437028	0.471429	0.528571	0.05036
X1_23019863	1.08963	1.01351	0.156991	0.354806	0.928571	0.0714286	0.637273
X1_23020053	1.02255	0.938394	0.344882	0.394732	0.0428571	0.957143	0.681903
X1_23020195	0.977253	1.0714	0.322006	0.36919	0.442857	0.557143	0.258845
X1_23020252	0.938394	1.02255	0.394732	0.344882	0.957143	0.0428571	0.681903
X1_23020303	1.02255	0.938394	0.344882	0.394732	0.0428571	0.957143	0.681903
X1_23020419	1.0538	0.937615	0.363154	0.287537	0.3	0.7	0.197966
X1_23020533	1.02701	0.885947	0.352571	0.0954235	0.0571429	0.942857	0.430323
X1_23020682	1.02558	0.986869	0.360852	0.260271	0.171429	0.828571	0.725743
X1_23020767	0.990289	1.03208	0.392578	0.323526	0.685714	0.314286	0.640783
X1_23020773	1.02255	0.938394	0.344882	0.394732	0.0428571	0.957143	0.681903
X1_23020827	1.04715	0.989082	0.343993	0.347358	0.485714	0.514286	0.484728
X1_23020828	1.02558	0.986869	0.360852	0.260271	0.171429	0.828571	0.725743
X1_23020844	1.09134	1.00688	0.45362	0.325971	0.857143	0.142857	0.476718
X1_23020913	0.986869	1.02558	0.260271	0.360852	0.828571	0.171429	0.725743
X1_23020936	1.00585	1.02768	0.342421	0.34951	0.6	0.4	0.797194
X1_23021152	1.00548	1.19397	0.317379	0.626624	0.0714286	0.928571	0.240998
X1_23021165	0.853744	1.02896	0.120511	0.351325	0.942857	0.0571429	0.326677
X1_23021186	0.968732	1.04047	0.292927	0.364877	0.7	0.3	0.428477
X1_23021188	1.04305	0.889691	0.342464	0.340862	0.157143	0.842857	0.17693
X1_23021210	1.02924	0.66904	0.34314	0.203158	0.0285714	0.971429	0.146122
X1_23021216	1.12265	1.01097	0.226839	0.351748	0.928571	0.0714286	0.488677
X1_23021223	1.00403	1.01961	0.261784	0.349122	0.957143	0.0428571	0.939541
X1_23021229	0.96805	1.02123	0.146751	0.350996	0.957143	0.0428571	0.795733
X1_23021238	0.853744	1.02896	0.120511	0.351325	0.942857	0.0571429	0.326677
X1_23021255	1.17223	1.01444	0.157435	0.347896	0.971429	0.0285714	0.526969
X1_23021303	1.02203	0.968136	0.350907	0.236297	0.0571429	0.942857	0.763646
X1_23021329	0.878006	1.02526	0.209152	0.348862	0.957143	0.0428571	0.472722
X1_23021335	0.774188	1.04189	0.353729	0.337204	0.914286	0.0857143	0.0682796
X1_23021361	0.918763	1.03008	0.118929	0.359644	0.9	0.1	0.421152
X1_23021366	0.854845	1.02889	0.195265	0.349805	0.942857	0.0571429	0.329937
X1_23021385	0.957386	1.03719	0.317947	0.352546	0.771429	0.228571	0.419546
X1_23021521	1.01223	1.10631	0.352402	0.219759	0.0714286	0.928571	0.559867
X1_23021636	1.02896	0.853744	0.351325	0.120511	0.0571429	0.942857	0.326677
X1_23021756	1.06929	1.01335	0.191475	0.357919	0.9	0.1	0.686594
X1_23021764	1.01335	1.06929	0.357919	0.191475	0.1	0.9	0.686594
X1_23021765	1.06929	1.01335	0.191475	0.357919	0.9	0.1	0.686594
X1_23021777	0.995281	1.02714	0.467957	0.295256	0.742857	0.257143	0.737826
X1_23021780	1.01335	1.06929	0.357919	0.191475	0.1	0.9	0.686594
X1_23021822	1.06929	1.01335	0.191475	0.357919	0.9	0.1	0.686594
X1_23021886	1.01335	1.06929	0.357919	0.191475	0.1	0.9	0.686594
X1_23021893	1.01335	1.06929	0.357919	0.191475	0.1	0.9	0.686594
X1_23021953	0.953972	1.04679	0.245206	0.377853	0.7	0.3	0.304816
X1_23022061	1.0221	0.94845	0.351095	0.124504	0.0428571	0.957143	0.719859
X1_23022063	0.94845	1.0221	0.124504	0.351095	0.957143	0.0428571	0.719859
X1_23022065	1.02437	0.948396	0.35629	0.0882373	0.0714286	0.928571	0.637924
X1_23022124	0.949443	1.0348	0.240166	0.363833	0.814286	0.185714	0.423974
X1_23022195	1.03293	0.86979	0.356093	0.0976719	0.0857143	0.914286	0.270272
